# Supplementary material
Source: PubMed Central journal article supplement (PMC10513755)
Supplement: NIHMS1927371-supplement-supplement.pdf [file NIHMS1927371-supplement-supplement.pdf]

# Evolution of artemisinin partial resistance in Ugandan malaria parasites

## Supplementary Appendix

Melissa D. Conrad, PhD<sup>1</sup>, Victor Asua, MSc<sup>2,3</sup>, Shreeya Garg, BS<sup>1</sup>, David Giesbrecht, PhD<sup>4</sup>, Karamoko Niaré, PhD<sup>4</sup>, Sawyer Smith, BS<sup>4</sup>, Jane F. Namuganga, MHS<sup>2</sup>, Thomas Katairo, MSc<sup>2</sup>, Jennifer Legac, BS<sup>1</sup>, Rebecca M. Crudale, BS<sup>4</sup> Patrick K. Tumwebaze, MSc<sup>2</sup>, Samuel L. Nsohya, PhD<sup>2</sup>, Roland A. Cooper, PhD<sup>5</sup>, Moses R. Kamyá, M.B.ChB, PhD<sup>2,6</sup>, Grant Dorsey, MD, PhD<sup>1</sup>, Jeffrey A. Bailey, MD, PhD<sup>4</sup>, Philip J. Rosenthal, MD<sup>1</sup>

<sup>1</sup>University of California, San Francisco, CA, USA; <sup>2</sup>Infectious Diseases Research Collaboration, Kampala, Uganda; <sup>3</sup>University of Tübingen, Tübingen, Germany; <sup>4</sup>Brown University, Providence, RI, USA; <sup>5</sup>Dominican University of California, San Rafael, CA, USA; <sup>6</sup>Makerere University, Kampala, Uganda

## Table of Contents

|                                                                                                                    |          |
|--------------------------------------------------------------------------------------------------------------------|----------|
| <b>SECTION 1: SUPPLEMENTAL METHODS</b> .....                                                                       | <b>2</b> |
| GENETIC SURVEILLANCE OF <i>P. FALCIPARUM</i> IN UGANDA.....                                                        | 2        |
| PHYLOGENETIC ANALYSIS OF ISOLATES WITH PARTIAL RESISTANCE MARKERS .....                                            | 2        |
| <u>Microsatellites</u> .....                                                                                       | 2        |
| <u>Genome-wide Variants</u> .....                                                                                  | 3        |
| <b>SECTION 2: SUPPLEMENTAL TABLES AND FIGURES</b> .....                                                            | <b>4</b> |
| Table S1. Malaria Reference Center surveillance sites .....                                                        | 4        |
| Table S2. Microsatellite primer sequences.....                                                                     | 4        |
| Table S3. Prevalence of 4 key PfK13 mutations at 16 surveillance sites .....                                       | 5        |
| Table S4. Prevalence of additional PfK13 propeller domain (codons 442-724) mutations, 2016-21 .....                | 8        |
| Table S5. Prevalence of PfK13 mutations in codons upstream of propeller domain, 2016-21 .....                      | 10       |
| Table S6. Individual sample microsatellite haplotypes.....                                                         | 21       |
| Figure S1. Malaria metrics and prevalence of PfK13 mutations at sites that received IRS in 2010-2014 and 2017..... | 29       |
| Figure S2. Malaria metrics and prevalence of PfK13 mutations at sites that received IRS in 2015-2022.....          | 30       |
| Figure S3. Malaria metrics and prevalence of PfK13 mutations at sites that have no history of IRS.....             | 31       |

**SECTION 3: REFERENCES ..... 32**

## **SECTION 1: SUPPLEMENTAL METHODS**

### **GENETIC SURVEILLANCE OF *P. FALCIPARUM* IN UGANDA**

Dried blood spots (DBS) were collected from consenting individuals aged 6 months-10 years of age (2016-2018) or older than 6 months of age (2019-2020) who were diagnosed with uncomplicated malaria using rapid diagnostic tests or microscopy at 10 (2016-17) or 16 (2018-21) Malaria Reference Centers (MRCs) across Uganda. We targeted collection of 50 samples per MRC in 2016-19 and 100 samples in 2020 and 2021, although some collections fell short due to low malaria incidence (Fig. 1, Table S2). Sample collections were performed primarily in June-July each year, although collection periods were extended in areas of low malaria prevalence.

DNA was extracted from DBS using Chelex 100 as previously described.<sup>1</sup> PfK13 sequences were determined using both dideoxy sequencing of *pfk13* and molecular inversion probe (MIP) technology<sup>2,3</sup> for samples collected in 2017-2020, and using only MIP assessments for samples collected in 2016 and 2021. Dideoxy sequencing, MIP capture, library preparation, and sequencing were performed as previously described.<sup>1,2</sup> For MIP data, MIPTools software (version 0.19.12.13) was used to organize raw sequencing data and to perform variant calling (<https://github.com/bailey-lab/MIPTools>). Individual genotypes were assigned for polymorphic sites that were covered by a minimum of 5 unique molecular identifiers (UMIs) and variants were required to have a genotype allele count  $\geq 3$  UMIs for alternate alleles and  $\geq 2$  UMIs for reference alleles. When available, dideoxy sequencing data were used to supplement missing MIP data. Raw sequencing reads from MIP assays are available in the National Center for Biotechnology Information (NCBI) Sequence Read Archive under the following accession numbers PRJNA880926 (2016 samples), PRJNA880930 (2017 samples), PRJNA655702 (2018 and 2019 samples), PRJNA880932 (2020 samples), and PRJNA880933 (2021 samples). Dideoxy sequencing data were previously published<sup>1,4</sup> and can be located at the following accession numbers: [MH788997-MH789408](#) (2017 samples), [MT857288-MT857721](#) (2018 and 2019 samples), and OP859158 - OP860241 (2020 samples).

### **PHYLOGENETIC ANALYSIS OF ISOLATES WITH PARTIAL RESISTANCE MARKERS**

Microsatellites (Fig. 3A). To assess the origins of emerging PfK13 mutations in Uganda, we characterized 7 microsatellite loci flanking *pfk13* in Ugandan parasites. Parasites collected in 2017-2021 with PfK13 mutations of interest were paired with parasites lacking PfK13 mutations by collection period and site and genotyped at loci upstream (-0.15 kb, -3.7 kb, -6.36 kb, -31.9 kb) and downstream (+8.6 kb, +15.1 kb, +72.3 kb) of the *pfk13* gene using previously published Methods,<sup>5</sup> with some modifications. Briefly, 15  $\mu$ L reactions contained Promega 2X Master Mix and 267 nM of the forward and reverse primers. Primers were as indicated in Table S1. Cycling parameters were: initial denaturation at 94°C for 2 min, followed by 5 cycles of denaturation at

94°C for 30 s, annealing at 50°C for 30 s, and extension at 60°C for 30 s, followed by 40 cycles at 94°C for 30 s, annealing at 45°C for 30 s, and extension at 60°C for 30 s, with no final extension cycle.

Fragment analysis was performed by Quinatar Biosciences (Hayward, CA) using a ROX 350 size standard, and allele calling was done using MicroSatellite Parameterized Analysis Tools (MicroSPAT), available at <https://github.com/EPPIcenter/MicroSPAT>. Relatedness was evaluated in samples that had genotypes called for at least 6 of the 7 loci genotyped and had only one microsatellite allele called for each locus. The `meandistance.matrix` function in the R package `polysat` was used to generate a distance matrix from microsatellite data.<sup>6</sup> A neighbor-joining tree was inferred using the `njs()` function in `ape`,<sup>7</sup> and was plotted using the `ggtree` package.<sup>8</sup>

Genome-wide Variants (Fig. 3B). To determine the origins of parasites with PfK13 mutations, we compared genotypes of Ugandan (collected in 2020) and southeast Asian (isolates from the *P. falciparum* Community Project, v6.0 (<https://www.malariagen.net/resource/26>), collected in 2008-2013) parasites with PfK13 polymorphisms of interest. Genotypes from Ugandan parasites were generated using a genome-wide MIP panel designed to capture overall levels of differentiation and relatedness,<sup>2</sup> and equivalent variant sites were extracted from available Pf6K genomes, for which variants were called using a malaria-optimized GATK4 pipeline. Data pruning included removing samples with >90% missingness, loci with >50% missingness, and variants with a read count below 3. Using both monoclonal and polyclonal samples containing PfK13 469Y, 469F, or 675V mutations, a distance matrix was generated in R<sup>9</sup> using RStudio<sup>10</sup> and the `snpDiss()` function in `SNPRelate`.<sup>11</sup> Hierarchical clustering of the distance matrix used the complete linkage method, and the dendrogram was plotted using `ggtree`.<sup>8</sup>

**SECTION 2: SUPPLEMENTAL TABLES AND FIGURES****Table S1. Malaria Reference Center surveillance sites.**

| District  | Health Facility | Site Description | Samples Collected Per Year |      |      |      |      |      |      |
|-----------|-----------------|------------------|----------------------------|------|------|------|------|------|------|
|           |                 |                  | 2016                       | 2017 | 2018 | 2019 | 2020 | 2021 | 2022 |
| Agago     | Patongo HC III  | IRS stopped      | 49                         | 50   | 50   | 49   | 92   | 98   | 100  |
| Amolatar  | Amolatar HC IV  | IRS ongoing      | 53                         | 49   | 50   | 44   | 86   | 98   | 99   |
| Arua      | Opia HC III     | No IRS           | 50                         | 50   | 44   | 50   | 100  | 100  | 98   |
| Hoima     | Kigoroby HC IV  | No IRS           | -                          | -    | 50   | 50   | 100  | 100  | 96   |
| Jinja     | Bugembe HC IV   | No IRS           | 51                         | 49   | 47   | 50   | 97   | 100  | 100  |
| Kaabong   | Lokolia HC III  | No IRS           | -                          | -    | 50   | 50   | 103  | 100  | 99   |
| Kanungu   | Kihihi HC IV    | No IRS           | 50                         | 50   | 50   | 50   | 100  | 97   | 100  |
| Kapchorwa | Kaserem HC IV   | No IRS           | -                          | -    | 0*   | 48   | 0*   | 95   | 100  |
| Kasese    | Karambi HC III  | No IRS           | -                          | -    | 26*  | 50   | 100  | 100  | 100  |
| Katakwi   | Toroma HC IV    | IRS stopped      | -                          | -    | 50   | 50   | 100  | 98   | 100  |
| Koboko    | Lobule HC III   | No IRS           | -                          | -    | 50   | 50   | 99   | 100  | 100  |
| Kole      | Aboke HC IV     | IRS stopped      | 50                         | 49   | 50   | 50   | 100  | 98   | 100  |
| Lamwo     | Padibe HC IV    | IRS stopped      | 49                         | 49   | 50   | 43   | 99   | 96   | 100  |
| Mubende   | Kasambya HC IV  | No IRS           | 54                         | 50   | 47   | 43   | 100  | 97   | 100  |
| Rukiga**  | Kamwezi HC IV   | No IRS           | 50                         | 0*   | 0*   | 15*  | 44*  | 100  | 100  |
| Tororo    | Nagongera HC IV | IRS ongoing      | 50                         | 50   | 50   | 50   | 45*  | 99   | 100  |

Dash (-) indicates no samples were collected; HC = Health Centre; \*Low transmission at time of sample collection prevented meeting targets; \*\*Rukiga district was previously part of Kabale district.

**Table S2. Microsatellite primer sequences.**

| Locus    | Location                    | Primer  | Primer Sequence                 |
|----------|-----------------------------|---------|---------------------------------|
| -0.15 kb | Pf3D7_13_v3:1726927-1727151 | Forward | GAT TCC CTA TCA TAC GTC ATA G   |
|          |                             | Reverse | FAM-ACA AGG CGT AAA TAT TCG TG  |
| -3.7 kb  | Pf3D7_13_v3:1730575-1730738 | Forward | FAM- ATG AAA AGG AAC ATA CAC AC |
|          |                             | Reverse | GCA CAA ATC ACC ATA TTA TT      |
| -6.36 kb | Pf3D7_13_v3:1733075-1733360 | Forward | AAT TAG ACA GGA CTT GTT AAT G   |
|          |                             | Reverse | FAM-GGA TAT GTT ATC CAA AAT GCA |
| -31.9 kb | Pf3D7_13_v3:1758942-1759150 | Forward | FAM-AAT CAA TCA TGG AAA TTA TG  |
|          |                             | Reverse | TTG TTC ATT TAA GGG TAT TT      |
| +8.6 kb  | Pf3D7_13_v3:1715937-1716208 | Forward | ACG GGT TTC TGT ACG CCT CAC     |
|          |                             | Reverse | HEX-CTA AAT TAG TGG CTT CTT CAT |
| +15.1 kb | Pf3D7_13_v3:1709549-1709698 | Forward | CTT ACT TCT AGG AGA ATC CT      |
|          |                             | Reverse | HEX-GAT AAC TAC TCA TCT CCA CA  |
| +72.3 kb | Pf3D7_13_v3:1652456-1652695 | Forward | HEX-ATG GCT CTA TAA TAG GAA GG  |
|          |                             | Reverse | TGC AAA CTT TTT AGA CTT TT      |

**Table S3. Prevalence of 4 key PfK13 mutations at 16 surveillance sites.**

| District | Locus | 2016        | 2017        | 2018        | 2019         | 2020         | 2021         | 2022         | Trend   |
|----------|-------|-------------|-------------|-------------|--------------|--------------|--------------|--------------|---------|
|          |       | #Mut/N, (%) | #Mut/N, (%) | #Mut/N, (%) | #Mut/N, (%)  | #Mut/N, (%)  | #Mut/N, (%)  | #Mut/N, (%)  | p-value |
| Agago    | P441L | 0/30 (0)    | 0/42 (0)    | 1/31 (3.2)  | 0/46 (0)     | 0/79 (0)     | 0/54 (0)     | 0/67 (0)     | 0.42    |
|          | C469Y | 0/30 (0)    | 2/44 (4.5)  | 1/31 (3.2)  | 10/47 (21.3) | 33/79 (41.8) | 8/50 (16.0)  | 19/67 (28.4) | <0.0001 |
|          | A675V | 0/31 (0)    | 2/44 (4.5)  | 1/35 (2.9)  | 8/46 (17.4)  | 13/79 (16.5) | 7/52 (13.5)  | 9/68 (13.2)  | 0.009   |
|          | C469F | 0/30 (0)    | 0/42 (0)    | 0/30 (0)    | 0/39 (0)     | 0/79 (0)     | 0/50 (0)     | 0/64 (0)     | NA      |
|          | R561H | 0/22 (0)    | 0/44 (0)    | 0/30 (0)    | 0/48 (0)     | 0/79 (0)     | 0/43 (0)     | 0/55 (0)     | NA      |
| Amolatar | P441L | 0/28 (0)    | 0/48 (0)    | 0/4 (0)     | 0/26 (0)     | 0/85 (0)     | 0/49 (0)     | 0/13 (0)     | NA      |
|          | C469Y | 0/28 (0)    | 2/49 (4.1)  | 0/4 (0)     | 0/28 (0)     | 0/85 (0)     | 0/48 (0)     | 0/13 (0)     | 0.10    |
|          | A675V | 0/30 (0)    | 0/49 (0)    | 0/27 (0)    | 0/27 (0)     | 0/85 (0)     | 1/50 (2.0)   | 0/13 (0)     | 0.27    |
|          | C469F | 0/28 (0)    | 0/48 (0)    | 0/4 (0)     | 0/17 (0)     | 0/85 (0)     | 0/48 (0)     | 0/13 (0)     | NA      |
|          | R561H | 0/13 (0)    | 0/48 (0)    | 0/11 (0)    | 0/25 (0)     | 0/85 (0)     | 0/49 (0)     | 0/13 (0)     | NA      |
| Arua     | P441L | 0/31 (0)    | 0/42 (0)    | 0/20 (0)    | 0/24 (0)     | 0/81 (0)     | 0/69 (0)     | 1/76 (1.3)   | 0.25    |
|          | C469Y | 0/31 (0)    | 0/45 (0)    | 0/20 (0)    | 0/24 (0)     | 0/81 (0)     | 2/68 (2.9)   | 6/76 (7.9)   | 0.003   |
|          | A675V | 0/33 (0)    | 1/45 (2.2)  | 0/30 (0)    | 1/29 (3.4)   | 0/81 (0)     | 1/68 (1.5)   | 2/78 (2.6)   | 0.52    |
|          | C469F | 0/31 (0)    | 0/43 (0)    | 0/20 (0)    | 0/10 (0)     | 0/81 (0)     | 0/68 (0)     | 0/70 (0)     | NA      |
|          | R561H | 0/29 (0)    | 0/43 (0)    | 0/24 (0)    | 0/24 (0)     | 0/81 (0)     | 0/56 (0)     | 0/67 (0)     | NA      |
| Hoima    | P441L | -           | -           | 0/42 (0)    | 1/79 (1.3)   | 0/92 (0)     | 0/82 (0)     | 0/60 (0)     | 0.36    |
|          | C469Y | -           | -           | 0/42 (0)    | 0/83 (0)     | 8/92 (8.7)   | 0/82 (0)     | 0/60 (0)     | 0.82    |
|          | A675V | -           | -           | 0/45 (0)    | 0/82 (0)     | 6/92 (6.5)   | 0/82 (0)     | 14/63 (22.2) | <0.0001 |
|          | C469F | -           | -           | 1/42 (2.4)  | 0/47 (0)     | 0/92 (0)     | 0/82 (0)     | 0/60 (0)     | 0.07    |
|          | R561H | -           | -           | 0/42 (0)    | 0/82 (0)     | 0/92 (0)     | 0/65 (0)     | 0/53 (0)     | NA      |
| Jinja    | P441L | 0/29 (0)    | 0/48 (0)    | 0/37 (0)    | 0/89 (0)     | 0/96 (0)     | 0/95 (0)     | 0/99 (0)     | NA      |
|          | C469Y | 0/29 (0)    | 0/48 (0)    | 0/37 (0)    | 0/91 (0)     | 0/96 (0)     | 0/95 (0)     | 0/99 (0)     | NA      |
|          | A675V | 0/29 (0)    | 0/48 (0)    | 0/40 (0)    | 0/90 (0)     | 0/96 (0)     | 0/95 (0)     | 1/99 (1.0)   | 0.20    |
|          | C469F | 0/29 (0)    | 0/48 (0)    | 0/37 (0)    | 0/43 (0)     | 0/96 (0)     | 0/95 (0)     | 0/99 (0)     | NA      |
|          | R561H | 0/27 (0)    | 0/48 (0)    | 1/38 (2.6)  | 0/89 (0)     | 0/96 (0)     | 0/74 (0)     | 0/92 (0)     | 0.35    |
| Kaabong  | P441L | -           | -           | 0/30 (0)    | 0/45 (0)     | 0/75 (0)     | 0/60 (0)     | 0/64 (0)     | NA      |
|          | C469Y | -           | -           | 2/30 (6.7)  | 0/45 (0)     | 13/75 (17.3) | 7/57 (12.3)  | 10/64 (15.6) | 0.04    |
|          | A675V | -           | -           | 3/34 (8.8)  | 10/46 (21.7) | 14/75 (18.7) | 10/59 (16.9) | 4/68 (5.9)   | 0.19    |
|          | C469F | -           | -           | 0/29 (0)    | 0/31 (0)     | 0/75 (0)     | 3/57 (5.3)   | 0/60 (0)     | 0.36    |
|          | R561H | -           | -           | 0/30 (0)    | 0/44 (0)     | 0/75 (0)     | 0/40 (0)     | 0/54 (0)     | NA      |

## Evolution of artemisinin partial resistance in Ugandan malaria parasites Supplementary Appendix

| Table S3 (continued) |       |             |             |            |             |              |              |              |         |
|----------------------|-------|-------------|-------------|------------|-------------|--------------|--------------|--------------|---------|
| District             | Locus | 2016        | 2017        | 2018       | 2019        | 2020         | 2021         | 2022         | Trend   |
|                      |       | #Mut/N, (%) | #Mut/N, (%) | p-value    | #Mut/N, (%) | p-value      | #Mut/N, (%)  | #Mut/N, (%)  | p-value |
| Kanungu              | P441L | 0/37 (0)    | 0/48 (0)    | 0/36 (0)   | 0/59 (0)    | 2/91 (2.2)   | 3/50 (6.0)   | 15/65 (23.1) | <0.0001 |
|                      | C469Y | 0/37 (0)    | 0/48 (0)    | 0/35 (0)   | 0/64 (0)    | 0/91 (0)     | 0/46 (0)     | 0/65 (0)     | NA      |
|                      | A675V | 0/37 (0)    | 0/48 (0)    | 0/38 (0)   | 0/61 (0)    | 0/94 (0)     | 0/44 (0)     | 2/64 (3.1)   | 0.04    |
|                      | C469F | 0/37 (0)    | 0/48 (0)    | 1/36 (2.8) | 0/40 (0)    | 4/91 (4.4)   | 2/46 (4.3)   | 0/65 (0)     | 0.39    |
|                      | R561H | 0/37 (0)    | 0/48 (0)    | 0/36 (0)   | 0/62 (0)    | 0/91 (0)     | 0/37 (0)     | 1/51 (2.0)   | 0.13    |
| Kapchorwa            | P441L | -           | -           | -          | 0/16 (0)    | -            | 0/77 (0)     | 0/27 (0)     | NA      |
|                      | C469Y | -           | -           | -          | 0/16 (0)    | -            | 1/77 (1.3)   | 2/27 (7.4)   | 0.11    |
|                      | A675V | -           | -           | -          | 0/15 (0)    | -            | 3/71 (4.2)   | 9/30 (30.0)  | 0.0004  |
|                      | C469F | -           | -           | -          | 0/16 (0)    | -            | 0/77 (0)     | 0/26 (0)     | NA      |
|                      | R561H | -           | -           | -          | 0/14 (0)    | -            | 0/69 (0)     | 0/12 (0)     | NA      |
| Kasese               | P441L | -           | -           | 0/19 (0)   | 2/61 (3.3)  | 2/89 (2.2)   | 11/76 (14.5) | 14/91 (15.4) | 0.0001  |
|                      | C469Y | -           | -           | 0/19 (0)   | 0/61 (0)    | 0/89 (0)     | 0/78 (0)     | 8/91 (8.8)   | 0.0002  |
|                      | A675V | -           | -           | 0/24 (0)   | 0/64 (0)    | 0/92 (0)     | 0/75 (0)     | 3/92 (3.3)   | 0.02    |
|                      | C469F | -           | -           | 0/19 (0)   | 0/39 (0)    | 0/89 (0)     | 0/78 (0)     | 0/88 (0)     | NA      |
|                      | R561H | -           | -           | 0/17 (0)   | 0/60 (0)    | 0/90 (0)     | 0/61 (0)     | 0/85 (0)     | NA      |
| Katakwi              | P441L | -           | -           | 0/40 (0)   | 0/55 (0)    | 2/87 (2.3)   | 0/58 (0)     | 0/78 (0)     | 0.78    |
|                      | C469Y | -           | -           | 2/40 (5.0) | 3/61 (4.9)  | 12/87 (13.8) | 7/58 (12.1)  | 18/78 (23.1) | 0.0006  |
|                      | A675V | -           | -           | 1/45 (2.2) | 6/57 (10.5) | 6/88 (6.8)   | 9/58 (15.5)  | 14/75 (18.7) | 0.003   |
|                      | C469F | -           | -           | 0/40 (0)   | 0/36 (0)    | 0/86 (0)     | 0/58 (0)     | 0/68 (0)     | NA      |
|                      | R561H | -           | -           | 0/40 (0)   | 0/57 (0)    | 0/86 (0)     | 0/41 (0)     | 0/62 (0)     | NA      |
| Koboko               | P441L | -           | -           | 0/23 (0)   | 0/4 (0)     | 0/55 (0)     | 0/47 (0)     | 0/48 (0)     | NA      |
|                      | C469Y | -           | -           | 0/23 (0)   | 0/4 (0)     | 2/55 (3.6)   | 1/46 (2.2)   | 1/48 (2.1)   | 0.71    |
|                      | A675V | -           | -           | 0/34 (0)   | 0/5 (0)     | 5/64 (7.8)   | 5/44 (11.4)  | 6/47 (12.8)  | 0.02    |
|                      | C469F | -           | -           | 0/23 (0)   | 0/4 (0)     | 0/54 (0)     | 0/46 (0)     | 0/47 (0)     | NA      |
|                      | R561H | -           | -           | 0/26 (0)   | 0/3 (0)     | 0/62 (0)     | 0/27 (0)     | 0/35 (0)     | NA      |
| Kole                 | P441L | 0/23 (0)    | 0/46 (0)    | 0/36 (0)   | 0/56 (0)    | 0/85 (0)     | 0/56 (0)     | 0/74 (0)     | NA      |
|                      | C469Y | 1/23 (4.3)  | 1/47 (2.1)  | 0/36 (0)   | 3/56 (5.4)  | 12/85 (14.1) | 0/54 (0)     | 9/74 (12.2)  | 0.04    |
|                      | A675V | 0/26 (0)    | 1/47 (2.1)  | 1/34 (2.9) | 2/60 (3.3)  | 10/86 (11.6) | 2/58 (3.4)   | 6/78 (7.7)   | 0.06    |
|                      | C469F | 0/23 (0)    | 0/47 (0)    | 0/36 (0)   | 0/39 (0)    | 0/85 (0)     | 0/54 (0)     | 0/72 (0)     | NA      |
|                      | R561H | 0/22 (0)    | 0/47 (0)    | 0/36 (0)   | 0/57 (0)    | 0/84 (0)     | 0/42 (0)     | 0/37 (0)     | NA      |

## Evolution of artemisinin partial resistance in Ugandan malaria parasites Supplementary Appendix

| Table S3 (continued) |       |             |             |             |             |              |              |              |         |
|----------------------|-------|-------------|-------------|-------------|-------------|--------------|--------------|--------------|---------|
| District             | Locus | 2016        | 2017        | 2018        | 2019        | 2020         | 2021         | 2022         | Trend   |
|                      |       | #Mut/N, (%) | #Mut/N, (%) | p-value     | #Mut/N, (%) | p-value      | #Mut/N, (%)  | #Mut/N, (%)  | p-value |
| Lamwo                | P441L | 0/33 (0)    | 0/42 (0)    | 0/34 (0)    | 0/49 (0)    | 0/84 (0)     | 0/58 (0)     | 0/53 (0)     | NA      |
|                      | C469Y | 3/33 (9.1)  | 3/44 (6.8)  | 8/34 (23.5) | 5/50 (10.0) | 28/84 (33.3) | 16/51 (31.4) | 11/53 (20.8) | 0.002   |
|                      | A675V | 2/37 (5.4)  | 5/44 (11.4) | 1/36 (2.8)  | 6/49 (12.2) | 16/84 (19.0) | 12/53 (22.6) | 8/53 (15.1)  | 0.01    |
|                      | C469F | 0/31 (0)    | 0/43 (0)    | 0/31 (0)    | 0/31 (0)    | 0/84 (0)     | 0/51 (0)     | 0/46 (0)     | NA      |
|                      | R561H | 0/32 (0)    | 0/44 (0)    | 0/31 (0)    | 0/50 (0)    | 0/84 (0)     | 0/42 (0)     | 0/37 (0)     | NA      |
| Mubende              | P441L | 0/22 (0)    | 0/45 (0)    | 0/38 (0)    | 0/22 (0)    | 1/88 (1.1)   | 1/19 (5.3)   | 6/52 (11.5)  | 0.0004  |
|                      | C469Y | 0/26 (0)    | 1/46 (2.2)  | 0/36 (0)    | 0/22 (0)    | 3/88 (3.4)   | 0/19 (0)     | 0/52 (0)     | 0.99    |
|                      | A675V | 0/28 (0)    | 0/46 (0)    | 0/41 (0)    | 0/24 (0)    | 6/87 (6.9)   | 0/19 (0)     | 6/53 (11.3)  | 0.001   |
|                      | C469F | 0/26 (0)    | 0/45 (0)    | 4/38 (10.5) | 0/22 (0)    | 0/88 (0)     | 0/19 (0)     | 0/52 (0)     | 0.18    |
|                      | R561H | 0/26 (0)    | 0/46 (0)    | 0/38 (0)    | 0/21 (0)    | 0/88 (0)     | 0/16 (0)     | 0/53 (0)     | NA      |
| Rukiga               | P441L | 0/35 (0)    | -           | -           | 0/26 (0)    | 0/39 (0)     | 1/83 (1.2)   | 0/60 (0)     | 0.66    |
|                      | C469Y | 0/35 (0)    | -           | -           | 0/26 (0)    | 0/39 (0)     | 0/72 (0)     | 1/46 (2.2)   | 0.29    |
|                      | A675V | 0/42 (0)    | -           | -           | 1/21 (4.8)  | 1/39 (2.6)   | 2/82 (2.4)   | 3/59 (5.1)   | 0.19    |
|                      | C469F | 8/42 (19.0) | -           | -           | 0/14 (0)    | 11/39 (28.2) | 29/72 (40.3) | 23/60 (38.3) | 0.005   |
|                      | R561H | 0/41 (0)    | -           | -           | 0/23 (0)    | 0/39 (0)     | 11/67 (16.4) | 12/53 (22.6) | 0.0001  |
| Tororo               | P441L | 0/34 (0)    | 0/48 (0)    | 0/31 (0)    | 0/71 (0)    | 0/40 (0)     | 0/74 (0)     | 0/51 (0)     | NA      |
|                      | C469Y | 0/34 (0)    | 0/48 (0)    | 0/31 (0)    | 0/71 (0)    | 0/40 (0)     | 3/73 (4.1)   | 5/51 (9.8)   | 0.0006  |
|                      | A675V | 0/37 (0)    | 1/48 (2.1)  | 0/43 (0)    | 0/73 (0)    | 0/41 (0)     | 3/74 (4.1)   | 9/57 (15.8)  | 0.0001  |
|                      | C469F | 1/35 (2.9)  | 1/48 (2.1)  | 0/31 (0)    | 0/44 (0)    | 0/40 (0)     | 0/73 (0)     | 0/48 (0)     | 0.056   |
|                      | R561H | 0/34 (0)    | 0/48 (0)    | 0/32 (0)    | 0/70 (0)    | 0/41 (0)     | 0/66 (0)     | 0/39 (0)     | NA      |



**Table S4. Prevalence of additional PfK13 propeller domain (codons 441-724) mutations, 2016-22\*.**

| Locus | District | Year        | Mutation prevalence |
|-------|----------|-------------|---------------------|
| P441A | Agago    | 2022        | 2/67 (3.0%)         |
|       | Amolatar | 2021        | 1/45 (2.2%)         |
|       | Kaabong  | 2022        | 3/64 (4.7%)         |
| F442L | Kanungu  | 2018        | 3/35 (8.6%)         |
|       |          | 2019        | 2/24 (8.3%)         |
|       |          | 2020        | 7/83 (8.4%)         |
|       |          | 2021        | 1/42 (2.4%)         |
| N490T | Jinja    | 2021        | 1/73 (1.4%)         |
|       | Kanungu  | 2020        | 1/94 (1.1%)         |
|       |          | 2022        | 2/60 (3.3%)         |
|       | Katakwi  | 2020        | 1/87 (1.1%)         |
|       | Mubende  | 2019        | 1/21 (4.8%)         |
|       |          | 2020        | 1/88 (1.1%)         |
|       | Rukiga   | 2019        | 2/24 (8.3%)         |
| 2022  |          | 1/46 (2.2%) |                     |
| V517I | Katakwi  | 2021        | 1/47 (2.1%)         |
|       | Tororo   | 2016        | 2/34 (5.9%)         |
| S522C | Jinja    | 2022        | 1/99 (1.0%)         |
|       | Kole     | 2022        | 2/71 (2.8%)         |
| G533A | Agago    | 2019        | 1/40 (2.5%)         |
|       |          | 2020        | 1/80 (1.2%)         |
|       | Kanungu  | 2017        | 2/48 (4.2%)         |
|       | Kasese   | 2022        | 1/93 (1.1%)         |
|       | Mubende  | 2017        | 1/46 (2.2%)         |
| R539T | Amolatar | 2019        | 1/30 (3.3%)         |
|       | Hoima    | 2019        | 2/89 (2.2%)         |
|       | Kanungu  | 2020        | 1/94 (1.1%)         |
|       | Mubende  | 2017        | 1/46 (2.2%)         |
| I540T | Kanungu  | 2017        | 1/48 (2.1%)         |
|       |          | 2018        | 2/38 (5.3%)         |
|       |          | 2020        | 2/94 (2.1%)         |
| V555A | Kanungu  | 2022        | 5/51 (9.8%)         |
| Y558C | Kaabong  | 2021        | 1/34 (2.9%)         |
|       |          | 2020        | 2/90 (2.2%)         |
|       | Kasese   | 2021        | 3/53 (5.7%)         |
|       |          | 2022        | 2/85 (2.4%)         |
|       | Mubende  | 2020        | 1/88 (1.1%)         |
| A569V | Mubende  | 2022        | 8/53 (15.1%)        |
| R575K | Kanungu  | 2021        | 1/43 (2.3%)         |
|       | Katakwi  | 2022        | 1/79 (1.3%)         |
| A578S | Agago    | 2017        | 3/44 (6.8%)         |
|       |          | 2019        | 5/56 (8.9%)         |
|       |          | 2020        | 1/80 (1.2%)         |
|       |          | 2022        | 2/68 (2.9%)         |
|       | Amolatar | 2017        | 3/49 (6.1%)         |
|       |          | 2021        | 1/50 (2.0%)         |

Evolution of artemisinin partial resistance in Ugandan malaria parasites Supplementary Appendix

| Table S4 (continued) |          |             |                     |
|----------------------|----------|-------------|---------------------|
| Locus                | District | Year        | Mutation prevalence |
| A578S<br>(continued) | Arua     | 2017        | 1/45 (2.2%)         |
|                      |          | 2022        | 3/79 (3.8)          |
|                      | Hoima    | 2020        | 5/92 (5.4%)         |
|                      | Jinja    | 2016        | 2/34 (5.9%)         |
|                      |          | 2017        | 2/48 (4.2%)         |
|                      |          | 2022        | 1/99 (1.0%)         |
|                      | Kaabong  | 2018        | 1/33 (3.0%)         |
|                      |          | 2020        | 2/75 (2.7%)         |
|                      |          | 2021        | 2/58 (3.4%)         |
|                      | Kasese   | 2019        | 1/69 (1.4%)         |
|                      |          | 2020        | 2/93 (2.2%)         |
|                      |          | 2022        | 7/93 (7.5%)         |
|                      | Katakwi  | 2018        | 1/45 (2.2%)         |
|                      |          | 2019        | 2/65 (3.1%)         |
|                      |          | 2020        | 2/88 (2.3%)         |
|                      |          | 2021        | 1/57 (1.8%)         |
|                      | Koboko   | 2018        | 1/34 (2.9%)         |
|                      | Kole     | 2019        | 1/65 (1.5%)         |
| 2020                 |          | 1/86 (1.2%) |                     |
| 2022                 |          | 1/77 (1.3%) |                     |
| Lamwo                | 2020     | 2/85 (2.4%) |                     |
| Mubende              | 2017     | 1/46 (2.2%) |                     |
|                      | 2020     | 1/88 (1.1%) |                     |
| Tororo               | 2016     | 1/37 (2.7%) |                     |
| K607E                | Agago    | 2019        | 1/54 (1.9%)         |
|                      | Kanungu  | 2019        | 2/69 (2.9%)         |
|                      |          | 2020        | 3/93 (3.2%)         |
| V637I                | Hoima    | 2019        | 4/90 (4.4%)         |
|                      | Katakwi  | 2022        | 3/78 (3.8%)         |
|                      | Tororo   | 2020        | 1/41 (2.4%)         |
| V666I                | Arua     | 2016        | 1/30 (3.3%)         |
| P667L                | Mubende  | 2021        | 1/17 (5.9%)         |
| P667S                | Kasese   | 2022        | 3/92 (3.3%)         |
| A675T                | Tororo   | 2022        | 1/57 (1.8%)         |
| F699C                | Kasese   | 2022        | 5/88 (5.7%)         |
| L713F                | Kanungu  | 2021        | 2/37 (5.4%)         |
|                      |          | 2022        | 6/58 (10.3%)        |
|                      | Mubende  | 2021        | 1/17 (5.9%)         |
|                      |          | 2022        | 3/52 (5.8%)         |
| G718S                | Rukiga   | 2022        | 1/56 (1.8%)         |
| A724P                | Kanungu  | 2016        | 1/33 (3.0%)         |
|                      |          | 2022        | 2/58 (3.4%)         |
|                      | Kasese   | 2021        | 4/63 (6.3%)         |
|                      |          | 2022        | 7/88 (8.0%)         |

\*All identified propeller domain (codons 442-724) mutations excluding codons 441(L), 469, 561, and 675, which are described in Table S3, are shown. Data for loci or districts with no mutants in any year are not shown.

**Table S5. Prevalence of Pfk13 mutations in codons upstream of propeller domain, 2016-22.**

| Variant          | Codon | Site     | Year  | N    | N WT | N Mut | % WT | % Mut |      |
|------------------|-------|----------|-------|------|------|-------|------|-------|------|
| Lys9Arg          | 9     | Jinja    | 2016  | 24   | 23   | 1     | 95.8 | 4.2   |      |
| Glu23Gly         | 23    | Kole     | 2016  | 17   | 16   | 1     | 94.1 | 5.9   |      |
| Gly26Asp         | 26    | Agago    | 2021  | 38   | 37   | 1     | 97.4 | 2.6   |      |
| Phe45Tyr         | 45    | Agago    | 2016  | 21   | 20   | 1     | 95.2 | 4.8   |      |
|                  |       | Jinja    | 2016  | 25   | 24   | 1     | 96   | 4     |      |
| Lys108Glu        | 108   | Agago    | 2021  | 32   | 30   | 2     | 93.8 | 6.2   |      |
|                  |       |          | 2022  | 46   | 45   | 1     | 97.8 | 2.2   |      |
|                  |       | Kaabong  | 2021  | 28   | 27   | 1     | 96.4 | 3.6   |      |
|                  |       | Koboko   | 2022  | 29   | 28   | 1     | 96.6 | 3.4   |      |
|                  |       |          | Lamwo | 2016 | 23   | 22    | 1    | 95.7  | 4.3  |
|                  |       |          |       | 2021 | 34   | 33    | 1    | 97.1  | 2.9  |
|                  |       | 2022     | 36    | 34   | 2    | 94.4  | 5.6  |       |      |
| Rukiga           | 2022  | 45       | 44    | 1    | 97.8 | 2.2   |      |       |      |
| Asp109Val        | 109   | Mubende  | 2021  | 12   | 10   | 2     | 83.3 | 16.7  |      |
| Gly112Glu        | 112   | Katakwi  | 2022  | 40   | 39   | 1     | 97.5 | 2.5   |      |
|                  |       | Lamwo    | 2022  | 36   | 35   | 1     | 97.2 | 2.8   |      |
|                  |       | Rukiga   | 2022  | 45   | 44   | 1     | 97.8 | 2.2   |      |
|                  |       | Tororo   | 2022  | 26   | 24   | 2     | 92.3 | 7.7   |      |
| Leu116Ile        | 116   | Kanungu  | 2016  | 23   | 22   | 1     | 95.7 | 4.3   |      |
| Lys118Gln        | 118   | Jinja    | 2022  | 91   | 90   | 1     | 98.9 | 1.1   |      |
| Asn133Asp        | 133   | Agago    | 2022  | 43   | 42   | 1     | 97.7 | 2.3   |      |
| Ile134Thr        | 134   | Kasese   | 2021  | 37   | 36   | 1     | 97.3 | 2.7   |      |
|                  |       | Kole     | 2021  | 33   | 32   | 1     | 97   | 3     |      |
| Asn135Tyr        | 135   | Agago    | 2022  | 43   | 42   | 1     | 97.7 | 2.3   |      |
| His136_Asn137del | 136   | Kole     | 2022  | 59   | 58   | 1     | 98.3 | 1.7   |      |
| His136Asn        | 136   | Agago    | 2016  | 18   | 16   | 2     | 88.9 | 11.1  |      |
|                  |       | Jinja    | 2022  | 86   | 85   | 1     | 98.8 | 1.2   |      |
|                  |       | Koboko   | 2022  | 27   | 25   | 2     | 92.6 | 7.4   |      |
| Asn141_Asn142del | 141   | Agago    | 2021  | 31   | 30   | 1     | 96.8 | 3.2   |      |
|                  |       | Arua     | 2022  | 43   | 40   | 3     | 93   | 7     |      |
|                  |       | Hoima    | 2021  | 36   | 32   | 4     | 88.9 | 11.1  |      |
|                  |       | Kaabong  | 2021  | 29   | 28   | 1     | 96.6 | 3.4   |      |
|                  |       | Kasese   | 2022  | 69   | 65   | 4     | 94.2 | 5.8   |      |
| Asn141_Asn142dup | 141   | Agago    | 2016  | 16   | 15   | 1     | 93.8 | 6.2   |      |
|                  |       |          | 2021  | 31   | 28   | 3     | 90.3 | 9.7   |      |
|                  |       |          | 2022  | 44   | 43   | 1     | 97.7 | 2.3   |      |
|                  |       | Amolatar | 2016  | 8    | 6    | 2     | 75   | 25    |      |
|                  |       | Arua     | 2021  | 51   | 48   | 3     | 94.1 | 5.9   |      |
|                  |       |          | Hoima | 2021 | 36   | 31    | 5    | 86.1  | 13.9 |
|                  |       | 2022     |       | 23   | 20   | 3     | 87   | 13    |      |
|                  |       | Jinja    | 2022  | 91   | 63   | 28    | 69.2 | 30.8  |      |

## Evolution of artemisinin partial resistance in Ugandan malaria parasites Supplementary Appendix

| Table S5. (continued)           |       |           |      |    |      |       |      |       |
|---------------------------------|-------|-----------|------|----|------|-------|------|-------|
| Variant                         | Codon | Site      | Year | N  | N WT | N Mut | % WT | % Mut |
| Asn141_Asn142dup<br>(continued) | 141   | Kaabong   | 2021 | 29 | 25   | 4     | 86.2 | 13.8  |
|                                 |       |           | 2022 | 40 | 38   | 2     | 95   | 5     |
|                                 |       | Kanungu   | 2022 | 32 | 24   | 8     | 75   | 25    |
|                                 |       | Kapchorwa | 2021 | 28 | 27   | 1     | 96.4 | 3.6   |
|                                 |       | Kasese    | 2022 | 68 | 65   | 3     | 95.6 | 4.4   |
|                                 |       | Katakwi   | 2021 | 31 | 30   | 1     | 96.8 | 3.2   |
|                                 |       |           | 2022 | 35 | 33   | 2     | 94.3 | 5.7   |
|                                 |       | Koboko    | 2022 | 26 | 24   | 2     | 92.3 | 7.7   |
|                                 |       | Kole      | 2016 | 12 | 11   | 1     | 91.7 | 8.3   |
|                                 |       |           | 2021 | 33 | 32   | 1     | 97   | 3     |
|                                 |       |           | 2022 | 58 | 55   | 3     | 94.8 | 5.2   |
|                                 |       | Lamwo     | 2021 | 30 | 29   | 1     | 96.7 | 3.3   |
|                                 |       |           | 2022 | 28 | 24   | 4     | 85.7 | 14.3  |
|                                 |       | Mubende   | 2021 | 13 | 11   | 2     | 84.6 | 15.4  |
|                                 |       |           | 2022 | 49 | 37   | 12    | 75.5 | 24.5  |
|                                 |       | Rukiga    | 2016 | 34 | 33   | 1     | 97.1 | 2.9   |
|                                 |       |           | 2021 | 48 | 41   | 7     | 85.4 | 14.6  |
|                                 |       |           | 2022 | 43 | 36   | 7     | 83.7 | 16.3  |
|                                 |       | Tororo    | 2016 | 23 | 21   | 2     | 91.3 | 8.7   |
|                                 |       |           | 2021 | 57 | 54   | 3     | 94.7 | 5.3   |
| Asn142del                       | 142   | Agago     | 2016 | 16 | 15   | 1     | 93.8 | 6.2   |
|                                 |       |           | 2022 | 43 | 40   | 3     | 93   | 7     |
|                                 |       | Arua      | 2016 | 26 | 25   | 1     | 96.2 | 3.8   |
|                                 |       |           | 2021 | 51 | 49   | 2     | 96.1 | 3.9   |
|                                 |       |           | 2022 | 40 | 37   | 3     | 92.5 | 7.5   |
|                                 |       | Hoima     | 2022 | 23 | 22   | 1     | 95.7 | 4.3   |
|                                 |       | Jinja     | 2021 | 54 | 48   | 6     | 88.9 | 11.1  |
|                                 |       |           | 2022 | 86 | 72   | 14    | 83.7 | 16.3  |
|                                 |       | Kaabong   | 2022 | 39 | 35   | 4     | 89.7 | 10.3  |
|                                 |       | Kanungu   | 2022 | 31 | 29   | 2     | 93.5 | 6.5   |
|                                 |       | Kapchorwa | 2022 | 7  | 6    | 1     | 85.7 | 14.3  |
|                                 |       | Kasese    | 2022 | 68 | 57   | 11    | 83.8 | 16.2  |
|                                 |       | Koboko    | 2022 | 25 | 23   | 2     | 92   | 8     |
|                                 |       | Kole      | 2022 | 58 | 45   | 13    | 77.6 | 22.4  |
|                                 |       | Lamwo     | 2016 | 22 | 21   | 1     | 95.5 | 4.5   |
|                                 |       |           | 2021 | 30 | 27   | 3     | 90   | 10    |
|                                 |       | Mubende   | 2016 | 21 | 20   | 1     | 95.2 | 4.8   |
|                                 |       |           | 2022 | 41 | 33   | 8     | 80.5 | 19.5  |
|                                 |       | Rukiga    | 2016 | 34 | 31   | 3     | 91.2 | 8.8   |
|                                 |       |           | 2022 | 40 | 39   | 1     | 97.5 | 2.5   |
| Tororo                          | 2021  | 57        | 55   | 2  | 96.5 | 3.5   |      |       |
|                                 | 2022  | 24        | 23   | 1  | 95.8 | 4.2   |      |       |

Evolution of artemisinin partial resistance in Ugandan malaria parasites Supplementary Appendix

| Table S5. (continued)                          |       |           |      |    |      |       |      |       |
|------------------------------------------------|-------|-----------|------|----|------|-------|------|-------|
| Variant                                        | Codon | Site      | Year | N  | N WT | N Mut | % WT | % Mut |
| Asn142dup                                      | 142   | Agago     | 2016 | 16 | 15   | 1     | 93.8 | 6.2   |
|                                                |       |           | 2021 | 30 | 29   | 1     | 96.7 | 3.3   |
|                                                |       |           | 2022 | 43 | 41   | 2     | 95.3 | 4.7   |
|                                                |       | Arua      | 2016 | 26 | 22   | 4     | 84.6 | 15.4  |
|                                                |       |           | 2021 | 51 | 50   | 1     | 98   | 2     |
|                                                |       | Hoima     | 2021 | 10 | 7    | 3     | 70   | 30    |
|                                                |       | Jinja     | 2016 | 12 | 11   | 1     | 91.7 | 8.3   |
|                                                |       |           | 2021 | 52 | 49   | 3     | 94.2 | 5.8   |
|                                                |       | Kaabong   | 2021 | 24 | 22   | 2     | 91.7 | 8.3   |
|                                                |       |           | 2022 | 41 | 38   | 3     | 92.7 | 7.3   |
|                                                |       | Kanungu   | 2016 | 23 | 21   | 2     | 91.3 | 8.7   |
|                                                |       | Kasese    | 2022 | 69 | 66   | 3     | 95.7 | 4.3   |
|                                                |       | Koboko    | 2021 | 18 | 17   | 1     | 94.4 | 5.6   |
|                                                |       |           | 2022 | 26 | 24   | 2     | 92.3 | 7.7   |
|                                                |       | Kole      | 2016 | 13 | 11   | 2     | 84.6 | 15.4  |
|                                                |       |           | 2021 | 33 | 32   | 1     | 97   | 3     |
|                                                |       |           | 2022 | 60 | 52   | 8     | 86.7 | 13.3  |
|                                                |       | Lamwo     | 2016 | 22 | 21   | 1     | 95.5 | 4.5   |
|                                                |       |           | 2021 | 30 | 29   | 1     | 96.7 | 3.3   |
|                                                |       |           | 2022 | 34 | 28   | 6     | 82.4 | 17.6  |
| Mubende                                        | 2016  | 21        | 20   | 1  | 95.2 | 4.8   |      |       |
|                                                | 2022  | 42        | 30   | 12 | 71.4 | 28.6  |      |       |
| Rukiga                                         | 2022  | 42        | 40   | 2  | 95.2 | 4.8   |      |       |
| Tororo                                         | 2016  | 22        | 21   | 1  | 95.5 | 4.5   |      |       |
| Leu143_Thr149delinsAsnAsnLeuThrAlaAsnAsnIleSer | 143   | Kole      | 2022 | 58 | 57   | 1     | 98.3 | 1.7   |
| Leu143delinsAsnAsnVal                          | 143   | Agago     | 2021 | 30 | 27   | 3     | 90   | 10    |
|                                                |       |           | 2022 | 45 | 39   | 6     | 86.7 | 13.3  |
|                                                |       | Arua      | 2022 | 42 | 40   | 2     | 95.2 | 4.8   |
|                                                |       | Hoima     | 2022 | 28 | 23   | 5     | 82.1 | 17.9  |
|                                                |       | Jinja     | 2022 | 86 | 85   | 1     | 98.8 | 1.2   |
|                                                |       | Kaabong   | 2021 | 24 | 23   | 1     | 95.8 | 4.2   |
|                                                |       |           | 2022 | 42 | 36   | 6     | 85.7 | 14.3  |
|                                                |       | Kapchorwa | 2022 | 9  | 7    | 2     | 77.8 | 22.2  |
|                                                |       | Kasese    | 2022 | 69 | 67   | 2     | 97.1 | 2.9   |
|                                                |       | Katakwi   | 2021 | 31 | 30   | 1     | 96.8 | 3.2   |
|                                                |       |           | 2022 | 40 | 34   | 6     | 85   | 15    |
|                                                |       | Koboko    | 2021 | 18 | 17   | 1     | 94.4 | 5.6   |
|                                                |       |           | 2022 | 26 | 21   | 5     | 80.8 | 19.2  |
|                                                |       | Kole      | 2021 | 33 | 32   | 1     | 97   | 3     |
| 2022                                           | 61    |           | 58   | 3  | 95.1 | 4.9   |      |       |

Evolution of artemisinin partial resistance in Ugandan malaria parasites Supplementary Appendix

| Table S5. (continued)                |       |         |        |      |      |       |      |       |     |
|--------------------------------------|-------|---------|--------|------|------|-------|------|-------|-----|
| Variant                              | Codon | Site    | Year   | N    | N WT | N Mut | % WT | % Mut |     |
| Leu143delinsAsnAsnVal<br>(continued) | 143   | Lamwo   | 2016   | 23   | 21   | 2     | 91.3 | 8.7   |     |
|                                      |       |         | 2021   | 30   | 27   | 3     | 90   | 10    |     |
|                                      |       |         | 2022   | 30   | 26   | 4     | 86.7 | 13.3  |     |
|                                      |       | Tororo  | 2021   | 55   | 54   | 1     | 98.2 | 1.8   |     |
|                                      |       |         | 2022   | 26   | 22   | 4     | 84.6 | 15.4  |     |
| Leu143delinsAsnVal                   | 143   | Arua    | 2022   | 41   | 40   | 1     | 97.6 | 2.4   |     |
| Thr144Ser                            | 144   | Agago   | 2022   | 43   | 42   | 1     | 97.7 | 2.3   |     |
| Thr149Ser                            | 149   | Arua    | 2021   | 51   | 50   | 1     | 98   | 2     |     |
|                                      |       | Kasese  | 2022   | 68   | 66   | 2     | 97.1 | 2.9   |     |
|                                      |       | Katakwi | 2022   | 35   | 34   | 1     | 97.1 | 2.9   |     |
|                                      |       | Kole    | 2016   | 13   | 12   | 1     | 92.3 | 7.7   |     |
|                                      |       |         | 2021   | 33   | 32   | 1     | 97   | 3     |     |
|                                      |       | Lamwo   | 2021   | 30   | 29   | 1     | 96.7 | 3.3   |     |
|                                      |       | Tororo  | 2016   | 23   | 21   | 2     | 91.3 | 8.7   |     |
| Leu172Phe                            | 172   | Jinja   | 2022   | 93   | 92   | 1     | 98.9 | 1.1   |     |
| Ala175Ser                            | 175   | Arua    | 2016   | 28   | 27   | 1     | 96.4 | 3.6   |     |
| Ser182Thr                            | 182   | Kaabong | 2021   | 34   | 33   | 1     | 97.1 | 2.9   |     |
|                                      |       |         | 2022   | 44   | 43   | 1     | 97.7 | 2.3   |     |
|                                      |       | Kanungu | 2016   | 27   | 26   | 1     | 96.3 | 3.7   |     |
|                                      |       | Kole    | 2022   | 64   | 63   | 1     | 98.4 | 1.6   |     |
|                                      |       | Lamwo   | 2022   | 35   | 34   | 1     | 97.1 | 2.9   |     |
|                                      |       | Mubende | 2016   | 24   | 23   | 1     | 95.8 | 4.2   |     |
|                                      |       | Rukiga  | 2021   | 56   | 55   | 1     | 98.2 | 1.8   |     |
|                                      |       |         | Tororo | 2016 | 27   | 26    | 1    | 96.3  | 3.7 |
|                                      |       |         |        | 2021 | 58   | 57    | 1    | 98.3  | 1.7 |
| Leu187Phe                            | 187   | Lamwo   | 2016   | 29   | 28   | 1     | 96.6 | 3.4   |     |
| Lys189Asn                            | 189   | Agago   | 2016   | 19   | 18   | 1     | 94.7 | 5.3   |     |
|                                      |       |         | 2021   | 32   | 31   | 1     | 96.9 | 3.1   |     |
|                                      |       |         | 2022   | 50   | 45   | 5     | 90   | 10    |     |
|                                      |       | Arua    | 2022   | 50   | 48   | 2     | 96   | 4     |     |
|                                      |       | Hoima   | 2022   | 31   | 18   | 13    | 58.1 | 41.9  |     |
|                                      |       | Jinja   | 2021   | 44   | 42   | 2     | 95.5 | 4.5   |     |
|                                      |       | Kanungu | 2016   | 27   | 26   | 1     | 96.3 | 3.7   |     |
|                                      |       |         | 2022   | 29   | 27   | 2     | 93.1 | 6.9   |     |
|                                      |       | Kasese  | 2021   | 45   | 43   | 2     | 95.6 | 4.4   |     |
|                                      |       |         | 2022   | 73   | 72   | 1     | 98.6 | 1.4   |     |
|                                      |       | Katakwi | 2022   | 39   | 38   | 1     | 97.4 | 2.6   |     |
|                                      |       | Koboko  | 2021   | 21   | 18   | 3     | 85.7 | 14.3  |     |
|                                      |       | Kole    | 2016   | 15   | 14   | 1     | 93.3 | 6.7   |     |
|                                      |       |         | 2022   | 64   | 62   | 2     | 96.9 | 3.1   |     |
|                                      |       | Lamwo   | 2016   | 29   | 28   | 1     | 96.6 | 3.4   |     |
| 2022                                 | 35    |         | 33     | 2    | 94.3 | 5.7   |      |       |     |

Evolution of artemisinin partial resistance in Ugandan malaria parasites Supplementary Appendix

Table S5. (continued)

| Variant                  | Codon | Site      | Year | N  | N WT | N Mut | % WT | % Mut |
|--------------------------|-------|-----------|------|----|------|-------|------|-------|
| Lys189Asn<br>(continued) | 189   | Mubende   | 2016 | 24 | 22   | 2     | 91.7 | 8.3   |
|                          |       |           | 2022 | 50 | 43   | 7     | 86   | 14    |
|                          |       | Rukiga    | 2016 | 38 | 37   | 1     | 97.4 | 2.6   |
|                          |       |           | 2022 | 46 | 45   | 1     | 97.8 | 2.2   |
|                          |       | Tororo    | 2021 | 59 | 58   | 1     | 98.3 | 1.7   |
|                          |       |           | 2022 | 26 | 24   | 2     | 92.3 | 7.7   |
| Lys189Thr                | 189   | Agago     | 2016 | 19 | 13   | 6     | 68.4 | 31.6  |
|                          |       |           | 2021 | 32 | 20   | 12    | 62.5 | 37.5  |
|                          |       |           | 2022 | 50 | 40   | 10    | 80   | 20    |
|                          |       | Amolatar  | 2021 | 19 | 17   | 2     | 89.5 | 10.5  |
|                          |       | Arua      | 2016 | 28 | 8    | 20    | 28.6 | 71.4  |
|                          |       |           | 2021 | 53 | 30   | 23    | 56.6 | 43.4  |
|                          |       |           | 2022 | 50 | 28   | 22    | 56   | 44    |
|                          |       | Hoima     | 2021 | 34 | 20   | 14    | 58.8 | 41.2  |
|                          |       |           | 2022 | 31 | 20   | 11    | 64.5 | 35.5  |
|                          |       | Jinja     | 2016 | 14 | 9    | 5     | 64.3 | 35.7  |
|                          |       |           | 2021 | 60 | 41   | 19    | 68.3 | 31.7  |
|                          |       |           | 2022 | 93 | 17   | 76    | 18.3 | 81.7  |
|                          |       | Kaabong   | 2021 | 36 | 24   | 12    | 66.7 | 33.3  |
|                          |       |           | 2022 | 44 | 25   | 19    | 56.8 | 43.2  |
|                          |       | Kanungu   | 2016 | 27 | 17   | 10    | 63   | 37    |
|                          |       |           | 2021 | 9  | 7    | 2     | 77.8 | 22.2  |
|                          |       |           | 2022 | 29 | 22   | 7     | 75.9 | 24.1  |
|                          |       | Kapchorwa | 2021 | 19 | 7    | 12    | 36.8 | 63.2  |
|                          |       | Kasese    | 2021 | 45 | 36   | 9     | 80   | 20    |
|                          |       |           | 2022 | 73 | 39   | 34    | 53.4 | 46.6  |
|                          |       | Katakwi   | 2021 | 39 | 31   | 8     | 79.5 | 20.5  |
|                          |       |           | 2022 | 39 | 27   | 12    | 69.2 | 30.8  |
|                          |       | Koboko    | 2021 | 21 | 9    | 12    | 42.9 | 57.1  |
|                          |       |           | 2022 | 28 | 16   | 12    | 57.1 | 42.9  |
|                          |       | Kole      | 2016 | 15 | 3    | 12    | 20   | 80    |
|                          |       |           | 2021 | 34 | 20   | 14    | 58.8 | 41.2  |
|                          |       |           | 2022 | 64 | 36   | 28    | 56.2 | 43.8  |
|                          |       | Lamwo     | 2016 | 29 | 19   | 10    | 65.5 | 34.5  |
|                          |       |           | 2021 | 34 | 23   | 11    | 67.6 | 32.4  |
|                          |       |           | 2022 | 35 | 18   | 17    | 51.4 | 48.6  |
|                          |       | Mubende   | 2016 | 24 | 13   | 11    | 54.2 | 45.8  |
|                          |       |           | 2021 | 13 | 8    | 5     | 61.5 | 38.5  |
|                          |       |           | 2022 | 50 | 33   | 17    | 66   | 34    |
|                          |       | Rukiga    | 2016 | 38 | 31   | 7     | 81.6 | 18.4  |
|                          |       |           | 2021 | 56 | 44   | 12    | 78.6 | 21.4  |
|                          |       |           | 2022 | 46 | 30   | 16    | 65.2 | 34.8  |

Evolution of artemisinin partial resistance in Ugandan malaria parasites Supplementary Appendix

| Table S5. (continued)    |       |           |      |    |      |       |      |       |
|--------------------------|-------|-----------|------|----|------|-------|------|-------|
| Variant                  | Codon | Site      | Year | N  | N WT | N Mut | % WT | % Mut |
| Lys189Thr<br>(continued) | 189   | Tororo    | 2016 | 27 | 16   | 11    | 59.3 | 40.7  |
|                          |       |           | 2021 | 57 | 42   | 15    | 73.7 | 26.3  |
|                          |       |           | 2022 | 26 | 20   | 6     | 76.9 | 23.1  |
| Ile205Thr                | 205   | Kanungu   | 2022 | 29 | 27   | 2     | 93.1 | 6.9   |
|                          |       | Rukiga    | 2021 | 54 | 53   | 1     | 98.1 | 1.9   |
|                          |       |           | 2022 | 46 | 44   | 2     | 95.7 | 4.3   |
| Glu208Lys                | 208   | Rukiga    | 2021 | 69 | 67   | 2     | 97.1 | 2.9   |
| Asn217His                | 217   | Agago     | 2022 | 62 | 61   | 1     | 98.4 | 1.6   |
|                          |       | Hoima     | 2022 | 52 | 47   | 5     | 90.4 | 9.6   |
|                          |       | Jinja     | 2021 | 84 | 83   | 1     | 98.8 | 1.2   |
|                          |       | Katakwi   | 2022 | 64 | 63   | 1     | 98.4 | 1.6   |
|                          |       | Kole      | 2022 | 74 | 72   | 2     | 97.3 | 2.7   |
|                          |       | Mubende   | 2021 | 15 | 14   | 1     | 93.3 | 6.7   |
|                          |       | Tororo    | 2022 | 40 | 39   | 1     | 97.5 | 2.5   |
| Arg255Lys                | 255   | Agago     | 2016 | 28 | 24   | 4     | 85.7 | 14.3  |
|                          |       |           | 2021 | 53 | 51   | 2     | 96.2 | 3.8   |
|                          |       |           | 2022 | 65 | 61   | 4     | 93.8 | 6.2   |
|                          |       | Arua      | 2016 | 29 | 28   | 1     | 96.6 | 3.4   |
|                          |       |           | 2021 | 70 | 63   | 7     | 90   | 10    |
|                          |       |           | 2022 | 77 | 66   | 11    | 85.7 | 14.3  |
|                          |       | Hoima     | 2021 | 84 | 82   | 2     | 97.6 | 2.4   |
|                          |       | Jinja     | 2022 | 99 | 98   | 1     | 99   | 1     |
|                          |       | Kaabong   | 2021 | 59 | 53   | 6     | 89.8 | 10.2  |
|                          |       |           | 2022 | 64 | 61   | 3     | 95.3 | 4.7   |
|                          |       | Kanungu   | 2016 | 35 | 34   | 1     | 97.1 | 2.9   |
|                          |       | Kapchorwa | 2021 | 77 | 75   | 2     | 97.4 | 2.6   |
|                          |       | Kasese    | 2021 | 73 | 71   | 2     | 97.3 | 2.7   |
|                          |       |           | 2022 | 93 | 85   | 8     | 91.4 | 8.6   |
|                          |       | Katakwi   | 2021 | 54 | 51   | 3     | 94.4 | 5.6   |
|                          |       |           | 2022 | 76 | 72   | 4     | 94.7 | 5.3   |
|                          |       | Koboko    | 2022 | 45 | 40   | 5     | 88.9 | 11.1  |
|                          |       | Kole      | 2021 | 57 | 55   | 2     | 96.5 | 3.5   |
|                          |       |           | 2022 | 76 | 70   | 6     | 92.1 | 7.9   |
|                          |       | Lamwo     | 2016 | 33 | 27   | 6     | 81.8 | 18.2  |
|                          |       |           | 2021 | 54 | 51   | 3     | 94.4 | 5.6   |
|                          |       |           | 2022 | 48 | 46   | 2     | 95.8 | 4.2   |
|                          |       | Rukiga    | 2021 | 82 | 80   | 2     | 97.6 | 2.4   |
|                          |       |           | 2022 | 61 | 60   | 1     | 98.4 | 1.6   |
|                          |       | Tororo    | 2016 | 30 | 28   | 2     | 93.3 | 6.7   |
|                          |       |           | 2021 | 72 | 71   | 1     | 98.6 | 1.4   |
|                          |       |           | 2022 | 52 | 48   | 4     | 92.3 | 7.7   |
| Leu258Met                | 258   | Agago     | 2022 | 65 | 62   | 3     | 95.4 | 4.6   |



Evolution of artemisinin partial resistance in Ugandan malaria parasites Supplementary Appendix

Table S5. (continued)

| Variant                  | Codon | Site      | Year | N  | N WT | N Mut | % WT | % Mut |
|--------------------------|-------|-----------|------|----|------|-------|------|-------|
| Leu258Met<br>(continued) | 258   | Amolatar  | 2016 | 27 | 20   | 7     | 74.1 | 25.9  |
|                          |       | Arua      | 2016 | 29 | 28   | 1     | 96.6 | 3.4   |
|                          |       | Jinja     | 2016 | 23 | 21   | 2     | 91.3 | 8.7   |
|                          |       | Kaabong   | 2021 | 59 | 58   | 1     | 98.3 | 1.7   |
|                          |       | Kanungu   | 2016 | 35 | 32   | 3     | 91.4 | 8.6   |
|                          |       |           | 2022 | 64 | 61   | 3     | 95.3 | 4.7   |
|                          |       | Kapchorwa | 2021 | 77 | 76   | 1     | 98.7 | 1.3   |
|                          |       | Kasese    | 2021 | 69 | 67   | 2     | 97.1 | 2.9   |
|                          |       |           | 2022 | 93 | 85   | 8     | 91.4 | 8.6   |
|                          |       | Katakwi   | 2021 | 54 | 53   | 1     | 98.1 | 1.9   |
|                          |       | Koboko    | 2022 | 45 | 44   | 1     | 97.8 | 2.2   |
|                          |       | Kole      | 2021 | 56 | 54   | 2     | 96.4 | 3.6   |
|                          |       |           | 2022 | 76 | 75   | 1     | 98.7 | 1.3   |
| Mubende                  | 2016  | 27        | 26   | 1  | 96.3 | 3.7   |      |       |
| Tororo                   | 2021  | 72        | 69   | 3  | 95.8 | 4.2   |      |       |
| Glu270Lys                | 270   | Kasese    | 2022 | 92 | 89   | 3     | 96.7 | 3.3   |
| Gln271His                | 271   | Arua      | 2021 | 62 | 61   | 1     | 98.4 | 1.6   |
|                          |       | Kole      | 2016 | 18 | 17   | 1     | 94.4 | 5.6   |
| Lys332Arg                | 332   | Kole      | 2022 | 68 | 67   | 1     | 98.5 | 1.5   |
| Asp343His                | 343   | Rukiga    | 2022 | 55 | 54   | 1     | 98.2 | 1.8   |
| Thr348Ile                | 348   | Hoima     | 2021 | 59 | 54   | 5     | 91.5 | 8.5   |
|                          |       | Kaabong   | 2022 | 54 | 51   | 3     | 94.4 | 5.6   |
|                          |       | Kanungu   | 2022 | 53 | 42   | 11    | 79.2 | 20.8  |
|                          |       | Kapchorwa | 2021 | 37 | 36   | 1     | 97.3 | 2.7   |
|                          |       | Kasese    | 2021 | 57 | 56   | 1     | 98.2 | 1.8   |
|                          |       |           | 2022 | 82 | 80   | 2     | 97.6 | 2.4   |
|                          |       | Lamwo     | 2021 | 46 | 45   | 1     | 97.8 | 2.2   |
|                          |       |           | 2022 | 45 | 40   | 5     | 88.9 | 11.1  |
|                          |       | Mubende   | 2021 | 14 | 12   | 2     | 85.7 | 14.3  |
|                          |       |           | 2022 | 50 | 44   | 6     | 88   | 12    |
|                          |       | Rukiga    | 2021 | 68 | 54   | 14    | 79.4 | 20.6  |
|                          |       |           | 2022 | 55 | 44   | 11    | 80   | 20    |
|                          |       | Tororo    | 2021 | 63 | 59   | 4     | 93.7 | 6.3   |
| 2022                     | 38    |           | 37   | 1  | 97.4 | 2.6   |      |       |
| Pro419Ser                | 419   | Jinja     | 2022 | 99 | 46   | 53    | 46.5 | 53.5  |
|                          |       | Kanungu   | 2021 | 51 | 50   | 1     | 98   | 2     |
|                          |       | Kasese    | 2021 | 80 | 78   | 2     | 97.5 | 2.5   |
|                          |       |           | 2022 | 93 | 91   | 2     | 97.8 | 2.2   |
|                          |       | Lamwo     | 2022 | 56 | 55   | 1     | 98.2 | 1.8   |
|                          |       | Rukiga    | 2021 | 84 | 83   | 1     | 98.8 | 1.2   |
| Leu428Phe                | 428   | Mubende   | 2021 | 18 | 16   | 2     | 88.9 | 11.1  |

Evolution of artemisinin partial resistance in Ugandan malaria parasites Supplementary Appendix

Table S5. (continued)

| Variant   | Codon | Site   | Year | N  | N WT | N Mut | % WT | % Mut |
|-----------|-------|--------|------|----|------|-------|------|-------|
| Glu433Asp | 433   | Agago  | 2021 | 48 | 47   | 1     | 97.9 | 2.1   |
|           |       | Arua   | 2022 | 76 | 72   | 4     | 94.7 | 5.3   |
|           |       | Kasese | 2022 | 91 | 87   | 4     | 95.6 | 4.4   |
|           |       | Lamwo  | 2021 | 54 | 53   | 1     | 98.1 | 1.9   |
|           |       | Tororo | 2022 | 51 | 50   | 1     | 98   | 2     |

**Table S6. Individual sample microsatellite haplotypes.** The table includes haplotypes for samples described in Fig 3A. "NA" indicates missing data. Microsatellite alleles comprising the most prevalent haplotype for each PfK13 mutation are highlighted in colors specific for the PfK13 genotype. When the same allele appeared in haplotypes for different PfK13 mutations, the allele was highlighted in color appropriate for that mutation. When these alleles appeared in WT samples, alleles were highlighted in the color assigned to 469F or 469Y.

| Sample ID | Site    | Year | Microsatellite Locus |         |        |         |        |         |         | PfK13 Genotype |
|-----------|---------|------|----------------------|---------|--------|---------|--------|---------|---------|----------------|
|           |         |      | neg31.9              | neg6.36 | neg3.7 | neg0.15 | pos8.6 | pos15.1 | pos72.3 |                |
| KS-06-22  | Kasese  | 2021 | 203                  | 279     | 142    | 194     | 280    | 138     | 232     | 441L           |
| KS-06-61  | Kasese  | 2021 | 203                  | 288     | 142    | 194     | 282    | 138     | 240     | 441L           |
| KS-06-77  | Kasese  | 2021 | 203                  | 288     | 142    | 194     | 282    | 138     | 240     | 441L           |
| KB-05-03  | Rukiga  | 2020 | 213                  | 276     | 156    | 204     | 272    | 141     | 244     | 469F           |
| KB-05-20  | Rukiga  | 2020 | 213                  | 276     | 156    | 202     | NA     | 141     | 244     | 469F           |
| KB-05-37  | Rukiga  | 2020 | 213                  | 276     | 156    | 202     | NA     | 141     | 244     | 469F           |
| KB-05-38  | Rukiga  | 2020 | 213                  | 276     | 156    | 204     | NA     | 141     | 244     | 469F           |
| KB-05-39  | Rukiga  | 2020 | 213                  | 276     | 156    | 192     | 272    | 141     | 244     | 469F           |
| KB-05-41  | Rukiga  | 2020 | 213                  | 276     | 156    | 204     | 272    | 141     | 244     | 469F           |
| KB-05-42  | Rukiga  | 2020 | 213                  | 276     | 156    | 204     | 272    | 141     | 244     | 469F           |
| KB-05-44  | Rukiga  | 2020 | 213                  | 276     | 156    | 204     | NA     | 141     | 244     | 469F           |
| KB-06-02  | Rukiga  | 2021 | 215                  | 276     | 156    | 204     | 272    | 141     | 244     | 469F           |
| KB-06-19  | Rukiga  | 2021 | 213                  | 276     | 156    | 204     | 272    | 141     | 244     | 469F           |
| KB-06-20  | Rukiga  | 2021 | 213                  | 276     | 156    | NA      | 272    | 141     | 244     | 469F           |
| KB-06-22  | Rukiga  | 2021 | 213                  | 276     | 156    | 204     | 272    | 141     | 244     | 469F           |
| KB-06-29  | Rukiga  | 2021 | 213                  | 276     | 156    | 204     | 272    | 141     | 227     | 469F           |
| KB-06-36  | Rukiga  | 2021 | 213                  | 276     | 156    | 204     | 272    | 141     | 244     | 469F           |
| KB-06-37  | Rukiga  | 2021 | 213                  | 276     | 156    | 204     | 272    | 141     | 227     | 469F           |
| KB-06-46  | Rukiga  | 2021 | 213                  | 276     | 156    | 204     | 272    | 141     | 244     | 469F           |
| KB-06-64  | Rukiga  | 2021 | 213                  | 276     | 156    | 204     | 272    | 141     | 244     | 469F           |
| KB-06-68  | Rukiga  | 2021 | 213                  | 276     | 156    | 204     | 272    | 141     | 244     | 469F           |
| KB-06-79  | Rukiga  | 2021 | 213                  | 276     | 156    | 204     | 272    | 141     | 244     | 469F           |
| KB-06-80  | Rukiga  | 2021 | 213                  | 276     | 156    | 204     | 270    | 141     | 244     | 469F           |
| KB-06-81  | Rukiga  | 2021 | 213                  | 276     | 156    | 204     | 272    | 141     | 244     | 469F           |
| KB-06-87  | Rukiga  | 2021 | 213                  | 276     | 156    | 204     | 272    | 141     | 244     | 469F           |
| KB-06-89  | Rukiga  | 2021 | 213                  | 276     | 156    | 204     | 272    | 141     | 244     | 469F           |
| KB-06-95  | Rukiga  | 2021 | 213                  | 276     | 156    | 204     | 272    | 141     | 244     | 469F           |
| KB-06-96  | Rukiga  | 2021 | 213                  | 276     | 156    | 204     | 272    | 141     | 227     | 469F           |
| KN-06-15  | Kanungu | 2021 | 207                  | 267     | 151    | 188     | 294    | 141     | 234     | 469F           |
| KN-06-72  | Kanungu | 2021 | 213                  | 276     | 156    | 204     | 272    | 141     | 244     | 469F           |
| AG-02-18  | Agago   | 2017 | 227                  | 273     | 156    | 194     | NA     | 138     | 236     | 469Y           |
| AG-02-29  | Agago   | 2017 | 227                  | 273     | 151    | 194     | 280    | NA      | 236     | 469Y           |
| AG-03-13  | Agago   | 2018 | 227                  | NA      | 151    | 194     | 280    | 138     | 236     | 469Y           |
| AG-05-13  | Agago   | 2020 | 227                  | 273     | 151    | 194     | 280    | 138     | 236     | 469Y           |
| AG-05-44  | Agago   | 2020 | 227                  | 273     | 151    | 194     | 280    | 138     | 236     | 469Y           |
| AG-05-59  | Agago   | 2020 | 227                  | 273     | 151    | 194     | 280    | 138     | 240     | 469Y           |
| AG-05-69  | Agago   | 2020 | 227                  | 273     | 151    | 194     | 280    | NA      | 240     | 469Y           |

Evolution of artemisinin partial resistance in Ugandan malaria parasites Supplementary Appendix

| Table S6 (continued) |         |      |                      |         |        |         |        |         |         |                |
|----------------------|---------|------|----------------------|---------|--------|---------|--------|---------|---------|----------------|
| Sample ID            | Site    | Year | Microsatellite Locus |         |        |         |        |         |         | PfK13 Genotype |
|                      |         |      | neg31.9              | neg6.36 | neg3.7 | neg0.15 | pos8.6 | pos15.1 | pos72.3 |                |
| AG-05-81             | Agago   | 2020 | 227                  | 273     | NA     | 194     | 280    | 138     | 236     | 469Y           |
| AG-06-40             | Agago   | 2021 | 227                  | 273     | 151    | 194     | NA     | 138     | 240     | 469Y           |
| AG-06-48             | Agago   | 2021 | 209                  | 273     | 151    | 194     | 280    | NA      | 236     | 469Y           |
| AR-06-85             | Arua    | 2021 | 227                  | 273     | 151    | 194     | 280    | 138     | 236     | 469Y           |
| HO-05-37             | Hoima   | 2020 | 227                  | 273     | 151    | 194     | 280    | 138     | 236     | 469Y           |
| HO-05-38             | Hoima   | 2020 | 227                  | 273     | 151    | 194     | 280    | 138     | 236     | 469Y           |
| HO-05-43             | Hoima   | 2020 | 227                  | 273     | 151    | 194     | 280    | 138     | 236     | 469Y           |
| HO-05-49             | Hoima   | 2020 | 227                  | 273     | 151    | 194     | 280    | 138     | 236     | 469Y           |
| HO-05-50             | Hoima   | 2020 | 227                  | 273     | 151    | 194     | 280    | 138     | 236     | 469Y           |
| KBG-05-27            | Kaabong | 2020 | 227                  | 273     | 151    | 194     | 280    | 138     | 236     | 469Y           |
| KBG-05-37            | Kaabong | 2020 | 227                  | 273     | NA     | 194     | 280    | 138     | 249     | 469Y           |
| KBG-05-89            | Kaabong | 2020 | 227                  | 273     | NA     | 194     | 280    | 138     | 249     | 469Y           |
| KBG-06-08            | Kaabong | 2021 | 227                  | 273     | 151    | 194     | 280    | 138     | 236     | 469Y           |
| KBG-06-25            | Kaabong | 2021 | 227                  | 273     | 151    | 194     | 280    | 138     | 249     | 469Y           |
| KBG-06-70            | Kaabong | 2021 | 227                  | 273     | 151    | NA      | 280    | 138     | 230     | 469Y           |
| KBG-06-96            | Kaabong | 2021 | 227                  | 273     | 151    | 194     | 280    | 138     | 236     | 469Y           |
| KBK-06-90            | Koboko  | 2021 | 227                  | 273     | 151    | 194     | 280    | 138     | 249     | 469Y           |
| KO-05-24             | Kole    | 2020 | 227                  | 273     | 151    | 194     | 280    | 138     | 232     | 469Y           |
| KTK-03-48            | Katakwi | 2018 | 227                  | NA      | 151    | 194     | 280    | 138     | 236     | 469Y           |
| KTK-05-28            | Katakwi | 2020 | 227                  | 276     | 151    | 194     | 280    | 132     | 242     | 469Y           |
| KTK-05-97            | Katakwi | 2020 | 227                  | 273     | 151    | 194     | 280    | 138     | 242     | 469Y           |
| KTK-06-18            | Katakwi | 2021 | 199                  | 273     | 170    | NA      | 278    | 138     | 240     | 469Y           |
| KTK-06-69            | Katakwi | 2021 | 227                  | 273     | 170    | 194     | 280    | 138     | 249     | 469Y           |
| LA-02-04             | Lamwo   | 2017 | 227                  | NA      | 151    | 194     | 280    | 138     | 236     | 469Y           |
| LA-03-08             | Lamwo   | 2018 | 196                  | 279     | 151    | 194     | 280    | 138     | 238     | 469Y           |
| LA-03-13             | Lamwo   | 2018 | 205                  | NA      | 151    | 194     | 280    | 138     | 236     | 469Y           |
| LA-05-07             | Lamwo   | 2020 | 227                  | 273     | 151    | 194     | 280    | 138     | 236     | 469Y           |
| LA-05-24             | Lamwo   | 2020 | 227                  | 273     | 151    | 194     | 280    | 141     | 234     | 469Y           |
| LA-05-40             | Lamwo   | 2020 | 227                  | 273     | 151    | 194     | 280    | 138     | 236     | 469Y           |
| LA-05-54             | Lamwo   | 2020 | 227                  | 273     | 151    | 194     | 280    | 138     | 236     | 469Y           |
| LA-05-55             | Lamwo   | 2020 | 227                  | 273     | 151    | 194     | 280    | 138     | 240     | 469Y           |
| LA-05-62             | Lamwo   | 2020 | 205                  | 273     | 151    | 194     | 280    | 138     | 236     | 469Y           |
| LA-05-74             | Lamwo   | 2020 | NA                   | 273     | 151    | 194     | 280    | 138     | 236     | 469Y           |
| LA-05-75             | Lamwo   | 2020 | 203                  | 273     | 151    | 192     | 280    | 138     | 246     | 469Y           |
| LA-05-81             | Lamwo   | 2020 | 227                  | 273     | 151    | NA      | 280    | 138     | 236     | 469Y           |
| LA-05-94             | Lamwo   | 2020 | 227                  | 273     | 151    | 192     | 280    | 138     | 236     | 469Y           |
| LA-06-03             | Lamwo   | 2021 | 207                  | 276     | 156    | 208     | 276    | 150     | 249     | 469Y           |
| LA-06-84             | Lamwo   | 2021 | 205                  | 273     | 170    | 194     | 280    | 138     | 249     | 469Y           |
| TO-06-20             | Tororo  | 2021 | 227                  | 273     | 151    | 192     | 280    | 138     | 236     | 469Y           |
| TO-06-48             | Tororo  | 2021 | 227                  | 273     | NA     | 194     | 280    | 138     | 249     | 469Y           |
| KB-06-04             | Rukiga  | 2021 | 209                  | 276     | 149    | 192     | 261    | 144     | 234     | 561H           |

Evolution of artemisinin partial resistance in Ugandan malaria parasites Supplementary Appendix

Table S6 (continued)

| Sample ID | Site      | Year | Microsatellite Locus |         |        |         |        |         |         | PfK13 Genotype |
|-----------|-----------|------|----------------------|---------|--------|---------|--------|---------|---------|----------------|
|           |           |      | neg31.9              | neg6.36 | neg3.7 | neg0.15 | pos8.6 | pos15.1 | pos72.3 |                |
| KB-06-09  | Rukiga    | 2021 | 205                  | 276     | 162    | 194     | 276    | 138     | 223     | 561H           |
| KB-06-18  | Rukiga    | 2021 | 205                  | 276     | 162    | 194     | 276    | 138     | 225     | 561H           |
| KB-06-27  | Rukiga    | 2021 | 205                  | 276     | 162    | 194     | 274    | 138     | 223     | 561H           |
| KB-06-78  | Rukiga    | 2021 | 205                  | 276     | 162    | 194     | 276    | 138     | 223     | 561H           |
| AG-02-12  | Agago     | 2017 | 219                  | 276     | 149    | 204     | 272    | 138     | 246     | 675V           |
| AG-03-40  | Agago     | 2018 | 219                  | NA      | 149    | 204     | 272    | 138     | 246     | 675V           |
| AG-04-12  | Agago     | 2019 | 219                  | NA      | 149    | 204     | 272    | 138     | 236     | 675V           |
| AG-04-40  | Agago     | 2019 | 219                  | 276     | 149    | 204     | 272    | 138     | 246     | 675V           |
| AG-05-15  | Agago     | 2020 | 219                  | 276     | 149    | 204     | 272    | 138     | 244     | 675V           |
| AG-05-16  | Agago     | 2020 | 219                  | 276     | 149    | 204     | 274    | 138     | 242     | 675V           |
| AG-05-47  | Agago     | 2020 | 227                  | 270     | 146    | 198     | 272    | 138     | 252     | 675V           |
| AG-05-48  | Agago     | 2020 | 219                  | 276     | 149    | 204     | 272    | 138     | 246     | 675V           |
| AG-05-75  | Agago     | 2020 | 219                  | 276     | 149    | 204     | NA     | 138     | 240     | 675V           |
| AG-06-06  | Agago     | 2021 | 219                  | 276     | 149    | 204     | 272    | 138     | 246     | 675V           |
| AG-06-33  | Agago     | 2021 | NA                   | 276     | 149    | 204     | 272    | 138     | 246     | 675V           |
| AM-06-12  | Amolatar  | 2021 | 221                  | 276     | 149    | 204     | 272    | 138     | 246     | 675V           |
| HO-05-05  | Hoima     | 2020 | 219                  | 276     | 149    | 204     | 272    | 138     | 246     | 675V           |
| HO-05-09  | Hoima     | 2020 | 219                  | 276     | 149    | 204     | 272    | 138     | 246     | 675V           |
| HO-05-10  | Hoima     | 2020 | 219                  | 276     | 149    | 204     | 272    | 138     | 246     | 675V           |
| KAP-06-18 | Kapchorwa | 2021 | 219                  | 276     | 149    | 204     | 272    | 138     | 246     | 675V           |
| KAP-06-23 | Kapchorwa | 2021 | 221                  | 276     | 149    | 204     | 272    | 138     | 234     | 675V           |
| KB-05-35  | Rukiga    | 2020 | 203                  | 276     | 154    | 200     | 284    | 138     | 225     | 675V           |
| KB-06-74  | Rukiga    | 2021 | 201                  | 285     | 151    | 192     | 266    | 138     | 234     | 675V           |
| KB-06-99  | Rukiga    | 2021 | 201                  | 285     | 151    | 208     | 264    | 138     | 234     | 675V           |
| KBG-04-27 | Kaabong   | 2019 | 219                  | NA      | 149    | 204     | 272    | 138     | 234     | 675V           |
| KBG-04-46 | Kaabong   | 2019 | 219                  | 276     | 149    | 204     | 272    | 138     | 246     | 675V           |
| KBG-05-30 | Kaabong   | 2020 | 207                  | 276     | 149    | NA      | 272    | 138     | 234     | 675V           |
| KBG-05-68 | Kaabong   | 2020 | 207                  | 276     | 149    | 204     | 272    | 138     | 244     | 675V           |
| KBG-05-80 | Kaabong   | 2020 | 219                  | 276     | 149    | 204     | 272    | 138     | 246     | 675V           |
| KBG-05-92 | Kaabong   | 2020 | 219                  | 276     | 149    | 204     | 272    | 138     | 246     | 675V           |
| KBG-06-18 | Kaabong   | 2021 | NA                   | 276     | 149    | 204     | 273    | 138     | 246     | 675V           |
| KBG-06-19 | Kaabong   | 2021 | 219                  | 276     | 149    | 204     | NA     | 138     | 246     | 675V           |
| KBG-06-28 | Kaabong   | 2021 | 219                  | 276     | 149    | 204     | 272    | 138     | 249     | 675V           |
| KBG-06-33 | Kaabong   | 2021 | 219                  | 276     | 149    | 204     | 272    | 138     | 246     | 675V           |
| KBG-06-60 | Kaabong   | 2021 | 209                  | 276     | 149    | 204     | 272    | 138     | 246     | 675V           |
| KBG-06-72 | Kaabong   | 2021 | 221                  | 276     | 149    | 204     | 272    | 138     | 246     | 675V           |
| KBK-05-36 | Koboko    | 2020 | 219                  | 276     | 149    | 204     | 272    | 138     | 246     | 675V           |
| KO-05-08  | Kole      | 2020 | 219                  | 276     | NA     | 204     | 272    | 138     | 249     | 675V           |
| KO-05-29  | Kole      | 2020 | 219                  | 276     | 149    | 204     | 272    | 138     | 246     | 675V           |
| KO-05-31  | Kole      | 2020 | 219                  | 276     | 149    | 204     | 272    | 138     | 246     | 675V           |
| KO-05-42  | Kole      | 2020 | 219                  | 276     | 149    | 204     | 272    | 138     | NA      | 675V           |

Evolution of artemisinin partial resistance in Ugandan malaria parasites Supplementary Appendix

Table S6 (continued)

| Sample ID | Site    | Year | Microsatellite Locus |         |        |         |        |         |         | PfK13 Genotype |
|-----------|---------|------|----------------------|---------|--------|---------|--------|---------|---------|----------------|
|           |         |      | neg31.9              | neg6.36 | neg3.7 | neg0.15 | pos8.6 | pos15.1 | pos72.3 |                |
| KTK-04-18 | Katakwi | 2019 | 219                  | 276     | 149    | 204     | 272    | 138     | 246     | 675V           |
| KTK-04-27 | Katakwi | 2019 | 219                  | NA      | 149    | 204     | 272    | 138     | 252     | 675V           |
| KTK-04-34 | Katakwi | 2019 | 219                  | 276     | 149    | 204     | 272    | 138     | 246     | 675V           |
| KTK-05-66 | Katakwi | 2020 | 219                  | 276     | 149    | 204     | 272    | 138     | 246     | 675V           |
| KTK-05-77 | Katakwi | 2020 | 219                  | 276     | 149    | 204     | 272    | 138     | 246     | 675V           |
| KTK-06-46 | Katakwi | 2021 | 219                  | 276     | 149    | NA      | 272    | 138     | 249     | 675V           |
| KTK-06-70 | Katakwi | 2021 | 219                  | 276     | NA     | 204     | 272    | 138     | 249     | 675V           |
| KTK-06-73 | Katakwi | 2021 | 219                  | 276     | 149    | 204     | 272    | 138     | 236     | 675V           |
| LA-02-24  | Lamwo   | 2017 | 219                  | 276     | 149    | 204     | 272    | 138     | 246     | 675V           |
| LA-02-43  | Lamwo   | 2017 | 219                  | 276     | 149    | 204     | 272    | 138     | 246     | 675V           |
| LA-04-43  | Lamwo   | 2019 | 219                  | 276     | 149    | 204     | 272    | 138     | 246     | 675V           |
| LA-05-25  | Lamwo   | 2020 | 219                  | 276     | 149    | 204     | 272    | 138     | 234     | 675V           |
| LA-05-30  | Lamwo   | 2020 | 219                  | 276     | 149    | 204     | 272    | 138     | 246     | 675V           |
| LA-05-39  | Lamwo   | 2020 | 219                  | 276     | 149    | NA      | 272    | 138     | 246     | 675V           |
| LA-05-70  | Lamwo   | 2020 | 219                  | 276     | 149    | 204     | 272    | 138     | 240     | 675V           |
| LA-05-79  | Lamwo   | 2020 | 219                  | 276     | 149    | NA      | 272    | 138     | 246     | 675V           |
| LA-05-82  | Lamwo   | 2020 | 219                  | 276     | 149    | 204     | NA     | 138     | 246     | 675V           |
| LA-05-86  | Lamwo   | 2020 | 219                  | 276     | 149    | NA      | 272    | 138     | 242     | 675V           |
| LA-05-99  | Lamwo   | 2020 | 219                  | 276     | 149    | 204     | 272    | 138     | 230     | 675V           |
| LA-06-55  | Lamwo   | 2021 | 219                  | 276     | 149    | NA      | 272    | 138     | 249     | 675V           |
| LA-06-77  | Lamwo   | 2021 | 219                  | 276     | NA     | 204     | 272    | 138     | 249     | 675V           |
| MU-05-04  | Mubende | 2020 | 201                  | 288     | 156    | 190     | 266    | 138     | 230     | 675V           |
| MU-05-77  | Mubende | 2020 | 203                  | 276     | 154    | 200     | NA     | 138     | 254     | 675V           |
| MU-05-83  | Mubende | 2020 | 203                  | 276     | 154    | 200     | 284    | 138     | 227     | 675V           |
| TO-06-55  | Tororo  | 2021 | 211                  | 276     | 149    | 204     | 272    | 138     | 246     | 675V           |
| TO-06-93  | Tororo  | 2021 | 219                  | 276     | 149    | 204     | 272    | 138     | 246     | 675V           |
| AG-06-34  | Agago   | 2021 | 221                  | 279     | 151    | 204     | 272    | 141     | 249     | 675V           |
| KBG-06-07 | Kaabong | 2021 | 219                  | 276     | 149    | 188     | 272    | NA      | 246     | 675V           |
| KBG-06-93 | Kaabong | 2021 | 201                  | 273     | 158    | 204     | 284    | 141     | 242     | 558C           |
| MU-06-86  | Mubende | 2021 | 211                  | 273     | 158    | 194     | 260    | 135     | 240     | 578S           |
| KS-06-16  | Kasese  | 2021 | 209                  | 273     | 154    | 202     | 286    | 141     | 246     | 724P           |
| KS-06-42  | Kasese  | 2021 | 209                  | 273     | 154    | 202     | 286    | 141     | 246     | 724P           |
| KS-06-43  | Kasese  | 2021 | 209                  | 273     | 154    | 202     | 286    | 141     | 246     | 724P           |
| KS-06-51  | Kasese  | 2021 | 209                  | 273     | 154    | 202     | 286    | 141     | 246     | 724P           |
| AG-02-47  | Agago   | 2017 | 211                  | 276     | 148    | 194     | 267    | 141     | 234     | WT             |
| AG-04-05  | Agago   | 2019 | 211                  | 276     | 142    | 204     | NA     | 141     | 240     | WT             |
| AG-04-11  | Agago   | 2019 | 207                  | 267     | 154    | 194     | NA     | 138     | 232     | WT             |
| AG-04-13  | Agago   | 2019 | 203                  | NA      | 164    | 202     | 272    | 138     | 244     | WT             |
| AG-04-39  | Agago   | 2019 | 205                  | 276     | 158    | 208     | 274    | 138     | 240     | WT             |
| AG-05-01  | Agago   | 2020 | 205                  | 273     | 160    | 202     | 276    | 144     | 232     | WT             |
| AG-05-02  | Agago   | 2020 | 211                  | 276     | 151    | 216     | 256    | 138     | 234     | WT             |

Evolution of artemisinin partial resistance in Ugandan malaria parasites Supplementary Appendix

Table S6 (continued)

| Sample ID | Site      | Year | Microsatellite Locus |         |        |         |        |         |         | PFK13 Genotype |
|-----------|-----------|------|----------------------|---------|--------|---------|--------|---------|---------|----------------|
|           |           |      | neg31.9              | neg6.36 | neg3.7 | neg0.15 | pos8.6 | pos15.1 | pos72.3 |                |
| AG-05-06  | Agago     | 2020 | 211                  | 273     | 158    | 202     | 289    | 141     | 242     | WT             |
| AG-05-22  | Agago     | 2020 | 205                  | 270     | 158    | 198     | 270    | 144     | 234     | WT             |
| AG-05-24  | Agago     | 2020 | 219                  | 276     | 149    | 204     | 272    | 138     | 252     | WT             |
| AG-05-36  | Agago     | 2020 | 207                  | 279     | 149    | 212     | 278    | 138     | 236     | WT             |
| AG-05-41  | Agago     | 2020 | 203                  | 273     | 162    | 194     | 276    | 138     | 230     | WT             |
| AG-05-49  | Agago     | 2020 | 205                  | NA      | 158    | 206     | 284    | 138     | 236     | WT             |
| AG-05-56  | Agago     | 2020 | 211                  | 267     | 154    | 194     | 289    | 141     | 230     | WT             |
| AG-05-57  | Agago     | 2020 | 203                  | 282     | 148    | 196     | 264    | 138     | 238     | WT             |
| AG-05-62  | Agago     | 2020 | 201                  | 285     | 151    | 194     | 264    | 135     | 234     | WT             |
| AG-05-63  | Agago     | 2020 | 201                  | 273     | 151    | 194     | 264    | 132     | 242     | WT             |
| AG-05-66  | Agago     | 2020 | 213                  | 279     | 151    | 204     | 278    | 141     | 230     | WT             |
| AG-05-76  | Agago     | 2020 | 207                  | 267     | 154    | 194     | 261    | 144     | 249     | WT             |
| AG-05-89  | Agago     | 2020 | 199                  | 267     | 156    | 194     | 264    | 141     | 227     | WT             |
| AG-06-15  | Agago     | 2021 | 213                  | 276     | 158    | 198     | 274    | 141     | 240     | WT             |
| AG-06-30  | Agago     | 2021 | 205                  | 276     | 149    | 200     | 259    | 138     | 248     | WT             |
| AG-06-46  | Agago     | 2021 | 201                  | 273     | 148    | 194     | 267    | 141     | 246     | WT             |
| AG-06-47  | Agago     | 2021 | 203                  | 270     | 149    | 194     | 276    | 138     | 238     | WT             |
| AG-06-60  | Agago     | 2021 | 203                  | 288     | 170    | 194     | 264    | 138     | 236     | WT             |
| AG-06-87  | Agago     | 2021 | 209                  | 279     | 149    | 188     | 280    | 138     | 234     | WT             |
| AM-05-02  | Amolatar  | 2020 | 205                  | 276     | 146    | 216     | 286    | 150     | 238     | WT             |
| AR-05-12  | Arua      | 2020 | 205                  | 279     | 172    | 216     | 267    | 138     | 249     | WT             |
| AR-05-43  | Arua      | 2020 | 211                  | NA      | 156    | 186     | 261    | 138     | 230     | WT             |
| AR-05-57  | Arua      | 2020 | 207                  | 262     | 162    | 208     | 280    | 138     | 246     | WT             |
| AR-05-66  | Arua      | 2020 | 233                  | 276     | 148    | 194     | 276    | 138     | 238     | WT             |
| AR-05-72  | Arua      | 2020 | 211                  | 273     | 151    | 194     | 282    | 138     | 240     | WT             |
| HO-05-06  | Hoima     | 2020 | 215                  | 276     | 154    | 192     | 276    | 125     | 254     | WT             |
| HO-05-08  | Hoima     | 2020 | 203                  | 273     | NA     | 202     | 274    | 138     | 249     | WT             |
| JI-05-07  | Jinja     | 2020 | 213                  | 285     | 166    | 202     | 289    | 138     | 259     | WT             |
| JI-05-12  | Jinja     | 2020 | 201                  | 270     | 151    | 194     | 272    | 138     | 238     | WT             |
| JI-05-30  | Jinja     | 2020 | 199                  | 276     | 166    | 194     | 286    | 141     | 230     | WT             |
| JI-05-36  | Jinja     | 2020 | 199                  | 276     | 166    | 194     | 286    | 141     | 230     | WT             |
| JI-05-51  | Jinja     | 2020 | 199                  | 276     | 166    | 194     | 286    | 141     | 230     | WT             |
| JI-05-57  | Jinja     | 2020 | 199                  | 276     | 166    | 194     | 286    | 141     | 230     | WT             |
| JI-05-74  | Jinja     | 2020 | 207                  | 267     | 160    | 214     | 282    | 138     | 236     | WT             |
| KAP-06-07 | Kapchorwa | 2021 | 203                  | 276     | 154    | 204     | 266    | 138     | 242     | WT             |
| KAP-06-62 | Kapchorwa | 2021 | 203                  | 267     | 142    | 194     | 294    | 144     | 234     | WT             |
| KB-05-01  | Rukiga    | 2020 | 211                  | 267     | 156    | 194     | 282    | 138     | 236     | WT             |
| KB-05-02  | Rukiga    | 2020 | 201                  | 273     | 158    | 202     | 270    | 141     | 248     | WT             |
| KB-05-04  | Rukiga    | 2020 | 221                  | 276     | 154    | 194     | 264    | 141     | 230     | WT             |
| KB-05-05  | Rukiga    | 2020 | 207                  | 276     | 148    | 194     | 270    | 138     | 227     | WT             |
| KB-05-09  | Rukiga    | 2020 | 201                  | 273     | 158    | 202     | 270    | 141     | 248     | WT             |

## Evolution of artemisinin partial resistance in Ugandan malaria parasites Supplementary Appendix

| Table S6 (continued) |         |      |                      |         |        |         |        |         |         |                |
|----------------------|---------|------|----------------------|---------|--------|---------|--------|---------|---------|----------------|
| Sample ID            | Site    | Year | Microsatellite Locus |         |        |         |        |         |         | PFK13 Genotype |
|                      |         |      | neg31.9              | neg6.36 | neg3.7 | neg0.15 | pos8.6 | pos15.1 | pos72.3 |                |
| KB-05-11             | Rukiga  | 2020 | 219                  | 270     | 149    | 204     | 274    | 141     | 244     | WT             |
| KB-05-12             | Rukiga  | 2020 | 217                  | 270     | 149    | 204     | NA     | 141     | 244     | WT             |
| KB-05-13             | Rukiga  | 2020 | 213                  | 267     | 158    | 194     | 289    | 141     | 240     | WT             |
| KB-05-16             | Rukiga  | 2020 | 199                  | 276     | 149    | 216     | 270    | 138     | 249     | WT             |
| KB-05-30             | Rukiga  | 2020 | 207                  | 276     | 154    | 194     | NA     | 138     | 242     | WT             |
| KB-05-40             | Rukiga  | 2020 | 201                  | 273     | 156    | 202     | 270    | 141     | 248     | WT             |
| KB-06-05             | Rukiga  | 2021 | 203                  | 276     | 170    | 194     | 286    | 138     | 230     | WT             |
| KB-06-06             | Rukiga  | 2021 | 205                  | 282     | 164    | NA      | 272    | 144     | 248     | WT             |
| KB-06-11             | Rukiga  | 2021 | 203                  | 276     | 170    | 194     | 286    | 138     | 230     | WT             |
| KB-06-13             | Rukiga  | 2021 | 203                  | 276     | 170    | NA      | 286    | 138     | 230     | WT             |
| KB-06-14             | Rukiga  | 2021 | 203                  | 276     | 170    | 194     | 286    | 138     | 230     | WT             |
| KB-06-24             | Rukiga  | 2021 | 203                  | 276     | 170    | 194     | 286    | 138     | 230     | WT             |
| KB-06-31             | Rukiga  | 2021 | 203                  | 276     | 170    | NA      | 286    | 138     | 230     | WT             |
| KB-06-33             | Rukiga  | 2021 | 201                  | 276     | 149    | 190     | 272    | 141     | 254     | WT             |
| KB-06-53             | Rukiga  | 2021 | 199                  | 279     | 154    | 198     | 276    | 138     | 249     | WT             |
| KB-06-56             | Rukiga  | 2021 | 213                  | 276     | 148    | 208     | 260    | 138     | 242     | WT             |
| KB-06-63             | Rukiga  | 2021 | 225                  | 273     | 148    | 194     | 276    | 138     | 234     | WT             |
| KB-06-73             | Rukiga  | 2021 | 209                  | 267     | 156    | 194     | 264    | 141     | 242     | WT             |
| KB-06-98             | Rukiga  | 2021 | 209                  | 288     | NA     | 194     | 260    | 138     | 230     | WT             |
| KBG-03-03            | Kaabong | 2018 | 223                  | NA      | 158    | 194     | 282    | 141     | 236     | WT             |
| KBG-03-25            | Kaabong | 2018 | 205                  | NA      | 160    | 194     | 286    | 138     | 240     | WT             |
| KBG-04-03            | Kaabong | 2019 | 225                  | 270     | 158    | 194     | 292    | 138     | 249     | WT             |
| KBG-04-35            | Kaabong | 2019 | 205                  | NA      | 158    | 206     | 274    | 138     | 242     | WT             |
| KBG-04-40            | Kaabong | 2019 | 211                  | 273     | 158    | 194     | 284    | 141     | 242     | WT             |
| KBG-04-49            | Kaabong | 2019 | 209                  | 279     | 158    | 194     | 267    | 141     | 238     | WT             |
| KBG-05-13            | Kaabong | 2020 | 207                  | 279     | 158    | 194     | 267    | 141     | 246     | WT             |
| KBG-05-56            | Kaabong | 2020 | 215                  | NA      | 158    | 202     | 270    | 141     | 234     | WT             |
| KBG-05-57            | Kaabong | 2020 | 199                  | NA      | 158    | 206     | 273    | 138     | 238     | WT             |
| KBG-05-66            | Kaabong | 2020 | 209                  | 273     | 154    | 194     | 267    | 138     | 254     | WT             |
| KBG-05-73            | Kaabong | 2020 | 209                  | 273     | 148    | 194     | 260    | 138     | 236     | WT             |
| KBG-05-84            | Kaabong | 2020 | 205                  | 276     | 151    | 204     | 267    | 138     | 236     | WT             |
| KBG-06-22            | Kaabong | 2021 | 203                  | 276     | 148    | 194     | 267    | 144     | 230     | WT             |
| KBG-06-23            | Kaabong | 2021 | 203                  | 276     | 151    | 198     | 272    | 147     | 234     | WT             |
| KBG-06-59            | Kaabong | 2021 | NA                   | 276     | 148    | 194     | 274    | 138     | 236     | WT             |
| KBG-06-73            | Kaabong | 2021 | 205                  | 273     | 158    | 194     | 282    | 141     | 249     | WT             |
| KBG-06-76            | Kaabong | 2021 | 211                  | 279     | 154    | 194     | 280    | 138     | 230     | WT             |
| KBG-06-79            | Kaabong | 2021 | 203                  | 276     | 142    | 194     | 260    | 138     | 252     | WT             |
| KBG-06-88            | Kaabong | 2021 | 203                  | 282     | 148    | 202     | 272    | 135     | 249     | WT             |
| KN-05-11             | Kanungu | 2020 | 199                  | 276     | 148    | 202     | 276    | 138     | 234     | WT             |
| KN-05-87             | Kanungu | 2020 | 201                  | 270     | 154    | 204     | 260    | 138     | 236     | 607E           |
| KN-06-36             | Kanungu | 2021 | 211                  | 276     | 162    | 194     | 276    | 138     | 242     | WT             |



Evolution of artemisinin partial resistance in Ugandan malaria parasites Supplementary Appendix

Table S6 (continued)

| Sample ID | Site    | Year | Microsatellite Locus |         |        |         |        |         |         | PFK13 Genotype |
|-----------|---------|------|----------------------|---------|--------|---------|--------|---------|---------|----------------|
|           |         |      | neg31.9              | neg6.36 | neg3.7 | neg0.15 | pos8.6 | pos15.1 | pos72.3 |                |
| KO-04-30  | Kole    | 2019 | 205                  | 276     | 148    | 194     | 276    | 138     | 234     | WT             |
| KO-05-15  | Kole    | 2020 | 211                  | 273     | 149    | 194     | 280    | 141     | 249     | WT             |
| KO-05-70  | Kole    | 2020 | 209                  | 276     | 149    | 192     | 272    | 141     | 246     | WT             |
| KO-05-95  | Kole    | 2020 | 205                  | 273     | NA     | 198     | 267    | 138     | 249     | WT             |
| KO-06-57  | Kole    | 2021 | 205                  | 276     | 174    | 198     | 292    | 150     | 232     | WT             |
| KS-05-01  | Kasese  | 2020 | 205                  | 276     | 162    | 194     | 276    | 138     | 254     | WT             |
| KS-05-07  | Kasese  | 2020 | 207                  | 276     | 151    | 194     | 266    | 138     | 246     | WT             |
| KS-05-29  | Kasese  | 2020 | 217                  | 267     | 154    | 194     | NA     | 144     | 230     | WT             |
| KS-05-38  | Kasese  | 2020 | 211                  | 267     | 154    | 194     | 282    | 138     | 234     | WT             |
| KS-05-64  | Kasese  | 2020 | 211                  | 267     | 154    | 194     | 278    | 138     | 236     | WT             |
| KS-06-55  | Kasese  | 2021 | 217                  | 276     | 160    | 198     | 264    | 138     | 254     | WT             |
| KS-06-57  | Kasese  | 2021 | 203                  | 273     | 149    | 198     | 272    | 138     | 230     | WT             |
| KS-06-85  | Kasese  | 2021 | 199                  | 288     | 149    | 194     | 280    | 138     | 256     | WT             |
| KTK-03-30 | Katakwi | 2018 | 207                  | NA      | 149    | 216     | 282    | 141     | 240     | WT             |
| KTK-03-49 | Katakwi | 2018 | 207                  | NA      | 154    | 194     | 291    | 138     | 242     | WT             |
| KTK-04-02 | Katakwi | 2019 | 209                  | 156     | 156    | 204     | 272    | 141     | 238     | WT             |
| KTK-04-26 | Katakwi | 2019 | 192                  | NA      | 149    | 194     | 267    | 138     | 242     | WT             |
| KTK-05-01 | Katakwi | 2020 | 205                  | 276     | NA     | 208     | 272    | 141     | 249     | WT             |
| KTK-05-24 | Katakwi | 2020 | 219                  | 267     | 149    | 194     | 280    | 141     | 246     | WT             |
| KTK-05-45 | Katakwi | 2020 | 201                  | 273     | 149    | 211     | 274    | 147     | 248     | WT             |
| KTK-05-67 | Katakwi | 2020 | 215                  | 270     | 148    | 202     | 286    | 138     | 254     | WT             |
| KTK-05-98 | Katakwi | 2020 | 207                  | 276     | 154    | 206     | 272    | 141     | 234     | WT             |
| KTK-06-37 | Katakwi | 2021 | 209                  | 273     | 149    | 196     | 289    | 141     | 254     | WT             |
| KTK-06-53 | Katakwi | 2021 | 199                  | 273     | 170    | NA      | 276    | 138     | 249     | WT             |
| KTK-06-91 | Katakwi | 2021 | 201                  | 285     | 170    | 194     | 291    | 138     | 240     | WT             |
| LA-02-02  | Lamwo   | 2017 | 203                  | 273     | 156    | 204     | 264    | 138     | 236     | WT             |
| LA-02-32  | Lamwo   | 2017 | 213                  | 276     | 156    | 194     | 276    | 138     | 244     | WT             |
| LA-02-47  | Lamwo   | 2017 | 211                  | 285     | 170    | 190     | 280    | 144     | 236     | WT             |
| LA-03-06  | Lamwo   | 2018 | 192                  | NA      | 149    | 194     | 267    | 138     | 232     | WT             |
| LA-04-21  | Lamwo   | 2019 | 205                  | 270     | 156    | 194     | 272    | 135     | 252     | WT             |
| LA-04-25  | Lamwo   | 2019 | 201                  | 273     | 162    | 194     | 282    | 138     | 236     | WT             |
| LA-04-32  | Lamwo   | 2019 | 211                  | NA      | 149    | 206     | 286    | 138     | 244     | WT             |
| LA-04-45  | Lamwo   | 2019 | 211                  | NA      | 158    | 204     | 294    | 138     | 246     | WT             |
| LA-05-03  | Lamwo   | 2020 | 203                  | 276     | 158    | 190     | 270    | 138     | 232     | WT             |
| LA-05-08  | Lamwo   | 2020 | 203                  | 267     | 160    | 194     | 264    | 138     | 234     | WT             |
| LA-05-10  | Lamwo   | 2020 | 199                  | 273     | 154    | 208     | 274    | 144     | 238     | WT             |
| LA-05-13  | Lamwo   | 2020 | 201                  | 270     | 149    | 198     | 276    | 141     | 249     | WT             |
| LA-05-17  | Lamwo   | 2020 | 196                  | 279     | 156    | 202     | 294    | 138     | 234     | WT             |
| LA-05-23  | Lamwo   | 2020 | 223                  | 273     | 156    | 198     | 272    | 138     | 254     | WT             |
| LA-05-35  | Lamwo   | 2020 | 211                  | 276     | 160    | 211     | NA     | 138     | 230     | WT             |
| LA-05-36  | Lamwo   | 2020 | 217                  | 276     | 158    | 198     | 264    | 141     | 242     | WT             |

Evolution of artemisinin partial resistance in Ugandan malaria parasites Supplementary Appendix

Table S6 (continued)

| Sample ID | Site    | Year | Microsatellite Locus |         |        |         |        |         |         | PK13 Genotype |
|-----------|---------|------|----------------------|---------|--------|---------|--------|---------|---------|---------------|
|           |         |      | neg31.9              | neg6.36 | neg3.7 | neg0.15 | pos8.6 | pos15.1 | pos72.3 |               |
| LA-05-52  | Lamwo   | 2020 | 223                  | 276     | 156    | 204     | 272    | 141     | 242     | WT            |
| LA-05-57  | Lamwo   | 2020 | 203                  | 273     | 149    | 202     | 284    | 141     | 244     | WT            |
| LA-05-59  | Lamwo   | 2020 | 205                  | 273     | 149    | 202     | 266    | 138     | 240     | WT            |
| LA-05-66  | Lamwo   | 2020 | 215                  | 279     | 156    | 194     | 266    | 144     | 234     | WT            |
| LA-05-89  | Lamwo   | 2020 | 201                  | 276     | 151    | 194     | 269    | 141     | 232     | WT            |
| LA-06-15  | Lamwo   | 2021 | 217                  | 276     | 158    | NA      | 266    | 141     | 217     | WT            |
| LA-06-24  | Lamwo   | 2021 | 201                  | 273     | 162    | 198     | 266    | 138     | 238     | WT            |
| LA-06-44  | Lamwo   | 2021 | 217                  | 282     | NA     | 194     | 274    | 132     | 249     | WT            |
| LA-06-58  | Lamwo   | 2021 | 205                  | 276     | 151    | 212     | 280    | 132     | 242     | WT            |
| LA-06-95  | Lamwo   | 2021 | 209                  | 279     | 170    | 194     | 270    | 132     | 236     | WT            |
| MU-05-09  | Mubende | 2020 | 203                  | 276     | 149    | NA      | 267    | 141     | 230     | WT            |
| MU-05-20  | Mubende | 2020 | 205                  | 276     | 162    | 194     | 276    | 138     | 223     | WT            |
| MU-05-44  | Mubende | 2020 | 201                  | 276     | NA     | 194     | 286    | 138     | 249     | WT            |
| MU-05-56  | Mubende | 2020 | 205                  | 273     | 149    | 194     | 294    | 138     | 244     | WT            |
| MU-06-56  | Mubende | 2021 | 205                  | 267     | 156    | 194     | 264    | 141     | 249     | WT            |
| TO-05-07  | Tororo  | 2020 | 203                  | 285     | 149    | 194     | 282    | 138     | 242     | WT            |
| TO-05-14  | Tororo  | 2020 | 203                  | NA      | 148    | 194     | 274    | 147     | 244     | WT            |
| TO-05-28  | Tororo  | 2020 | 207                  | 156     | 156    | 204     | 272    | 141     | 240     | WT            |
| TO-05-43  | Tororo  | 2020 | 209                  | 270     | 160    | 194     | 276    | 138     | 227     | WT            |
| TO-06-26  | Tororo  | 2021 | 211                  | 282     | 149    | 194     | 282    | 144     | 246     | WT            |
| TO-06-34  | Tororo  | 2021 | 196                  | 267     | 154    | 194     | 282    | 138     | 240     | WT            |
| TO-06-37  | Tororo  | 2021 | 211                  | 282     | 149    | 200     | 282    | 144     | 246     | WT            |
| TO-06-92  | Tororo  | 2021 | 205                  | 279     | 151    | NA      | 276    | 138     | 240     | WT            |

Table S7. Prevalence of key PfK13 mutations stratified by epidemiological categories

| Year | Sites with resurgence following withdrawal of IRS <sup>a</sup> | Sites with sustained IRS |                       |        | Sites with no history of IRS |                       |        |
|------|----------------------------------------------------------------|--------------------------|-----------------------|--------|------------------------------|-----------------------|--------|
|      | Prevalence <sup>b</sup>                                        | Prevalence <sup>b</sup>  | $\Delta P^c$ (95% CI) | p      | Prevalence <sup>b</sup>      | $\Delta P^c$ (95% CI) | p      |
| 2016 | 6/75 (8.0%)                                                    | 0/45 (0.0%)              | 8.0% (1.8-14.1%)      | 0.05   | 1/148 (0.7%)                 | 7.3% (.01-13.6%)      | 0.003  |
| 2017 | 14/135 (10.4%)                                                 | 3/96 (3.1%)              | 7.3% (1.0-13.5%)      | 0.04   | 2/185 (1.1%)                 | 9.3% (3.9-14.6%)      | <0.001 |
| 2018 | 14/132 (10.6%)                                                 | 0/33 (0%)                | 10.6% (5.4-15.9%)     | 0.05   | 9/236 (3.8%)                 | 6.8% (0.1-12.6%)      | 0.01   |
| 2019 | 35/188 (18.6%)                                                 | 0/93 (0%)                | 18.6% (13.1-24.2%)    | <0.001 | 14/397 (3.5%)                | 15.1% (9.2-20.9%)     | <0.001 |
| 2020 | 120/333 (36.0%)                                                | 0/125 (0%)               | 36.0% (30.9-41.2%)    | <0.001 | 76/704 (10.8%)               | 25.2% (19.6-30.9%)    | <0.001 |
| 2021 | 48/158 (30.4%)                                                 | 7/112 (6.3%)             | 24.1% (15.7-32.6%)    | <0.001 | 76/487 (15.6%)               | 14.8% (6.9-22.6%)     | <0.001 |
| 2022 | 72/225 (32.0%)                                                 | 9/49 (18.4%)             | 13.6% (1.2-26.1%)     | 0.06   | 111/536 (20.7%)              | 11.3% (4.3-18.3%)     | 0.001  |

<sup>a</sup> Reference group

<sup>b</sup> Presence of C469Y, A675V, C469F, R561H, or P441L mutation (only samples with results for all 5 mutations included)

<sup>c</sup>  $\Delta P$  = absolute difference in prevalence compared to reference group

Evolution of artemisinin partial resistance in Ugandan malaria parasites Supplementary Appendix

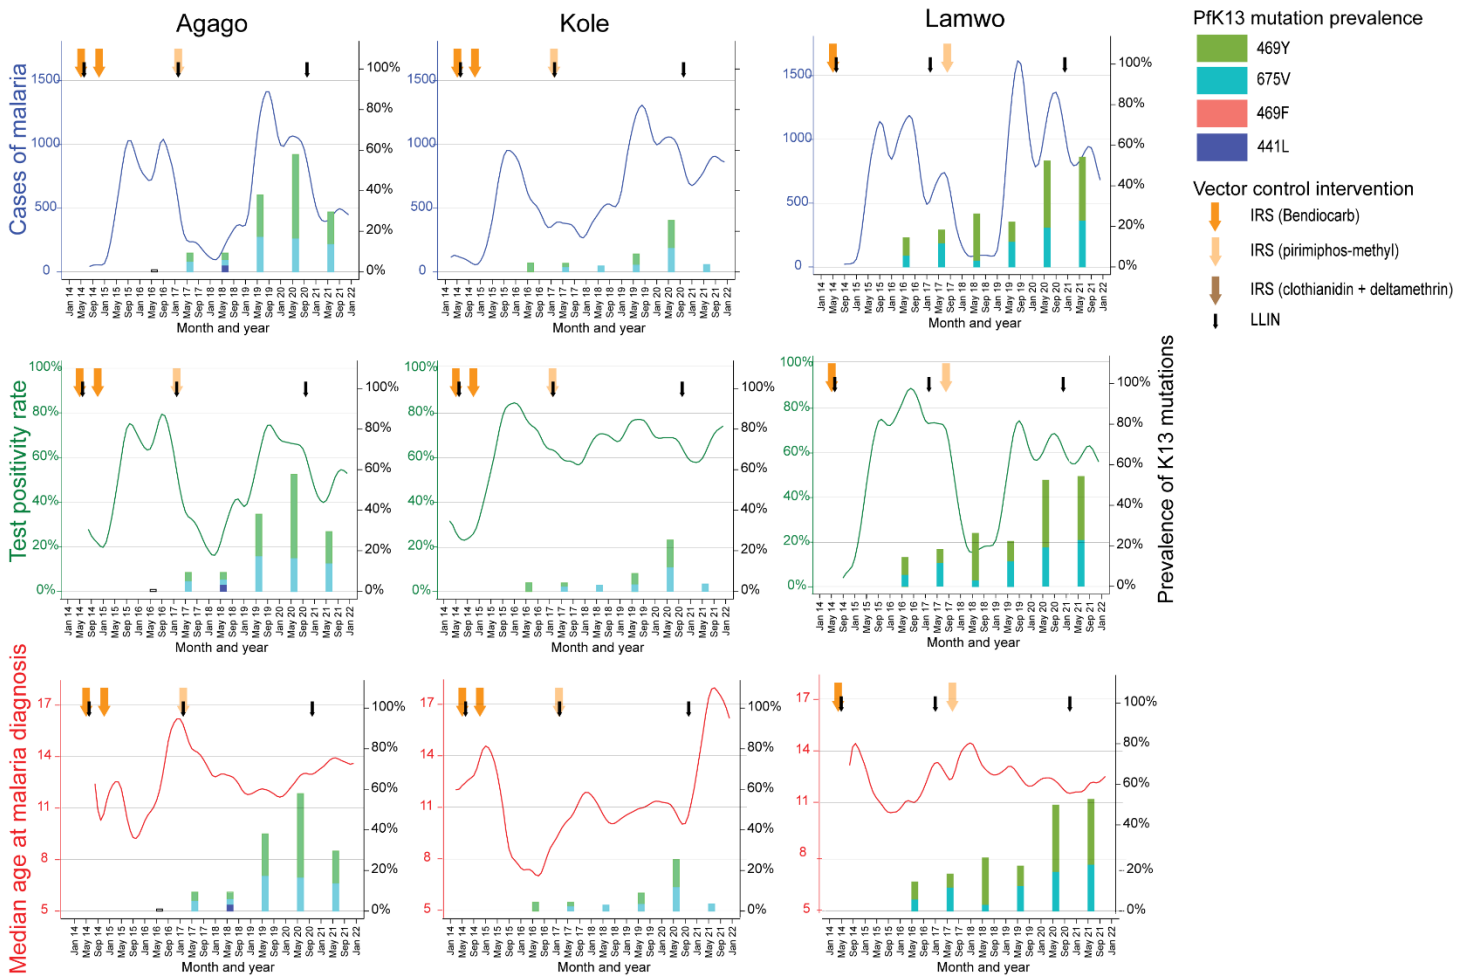

**Figure S1. Malaria metrics and prevalence of PfkK13 mutations at sites that received IRS in 2010-2014 and 2017.** Malaria incidence, test positivity rate, median age of patients at time of malaria and mutation prevalence are shown for sites that received IRS every 6 months from 2010-14 and once in 2017. The malaria metrics were assessed monthly and are displayed with lowest smoothing. Large arrows indicate times of IRS, as defined in the key. Small arrows indicate times of LLIN distributions. Histogram bars indicate prevalences of PfkK13 mutations (right axis). Lines represent malaria metrics (left axis).

Evolution of artemisinin partial resistance in Ugandan malaria parasites Supplementary Appendix

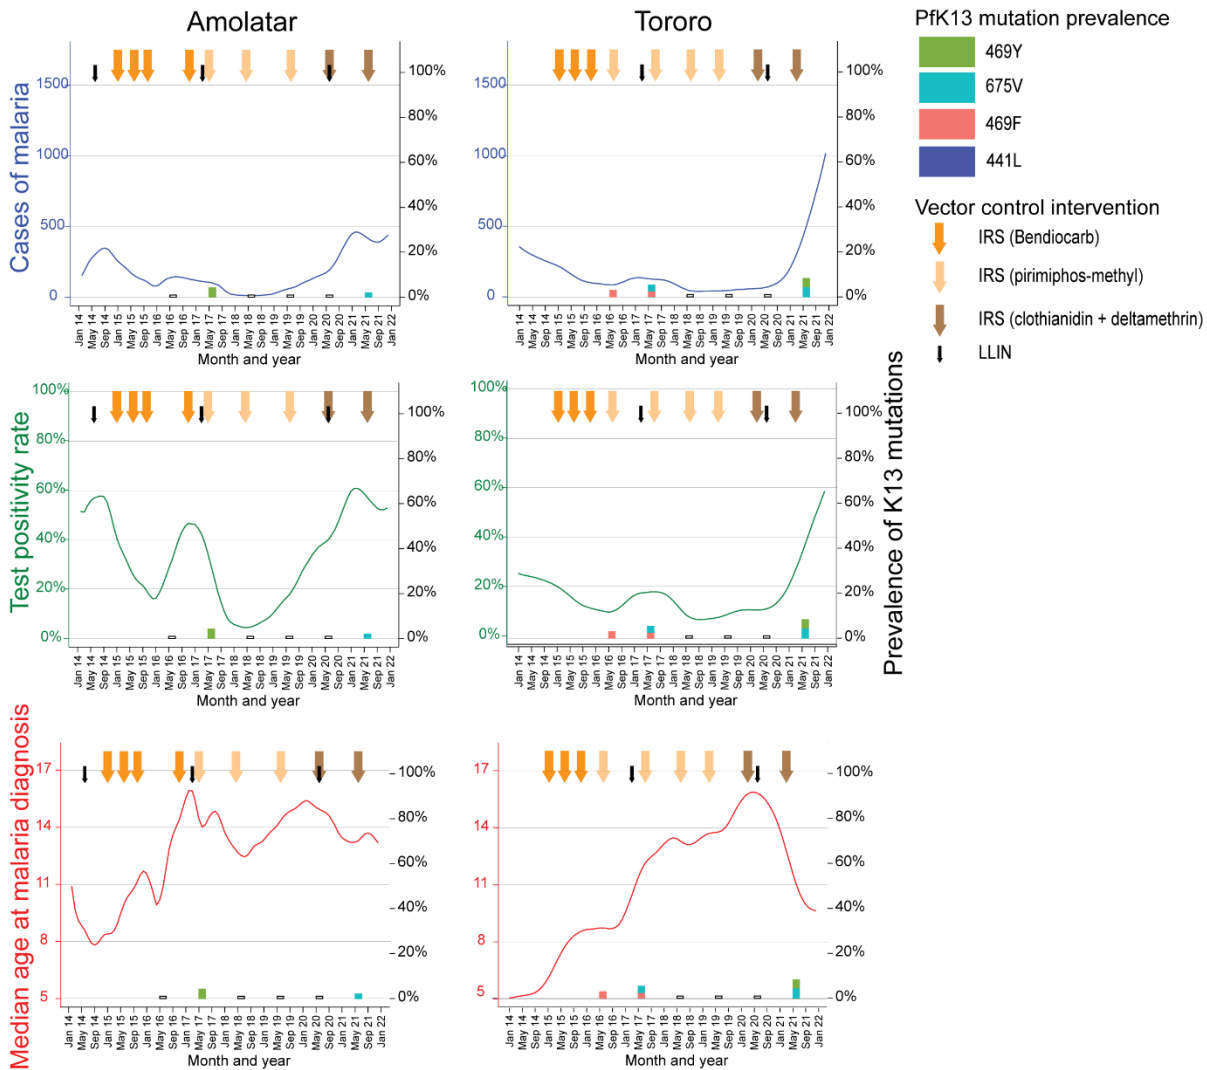

**Figure S2. Malaria metrics and prevalence of Pfk13 mutations at sites that received IRS in 2015-2022.** Malaria incidence, test positivity rate, median age of patients at time of malaria and mutation prevalence are shown for sites that received IRS beginning in 2015. The malaria metrics were assessed monthly and are displayed with less smoothing. Large arrows indicate times of IRS, as defined in the key. Small arrows indicate times of LLIN distributions. Histogram bars indicate prevalences of Pfk13 mutations (right axis). Lines represent malaria metrics (left axis).

Evolution of artemisinin partial resistance in Ugandan malaria parasites Supplementary Appendix

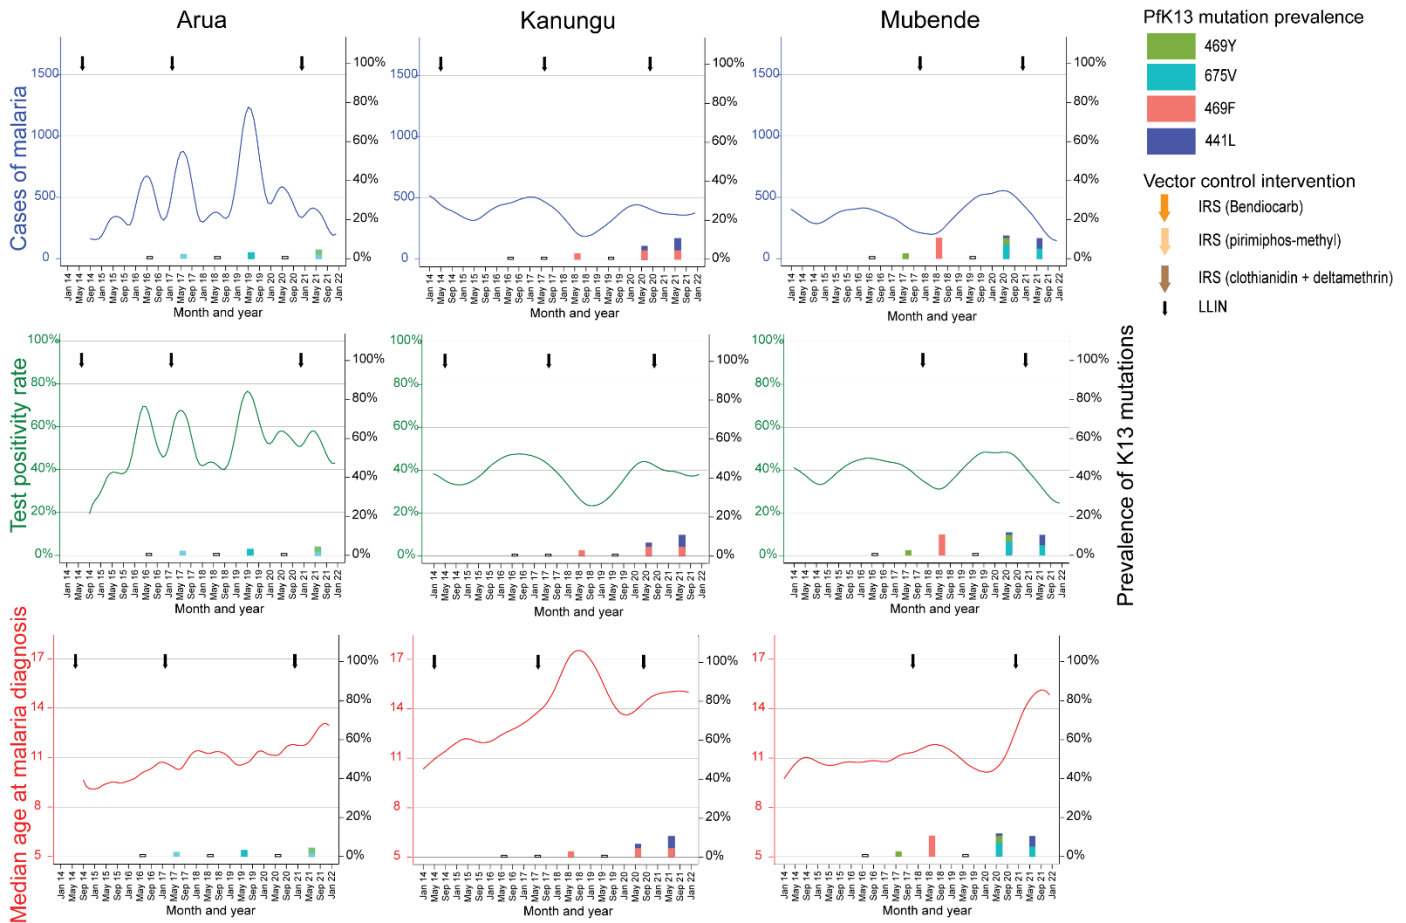

**Figure S3. Malaria metrics and prevalence of Pfk13 mutations at sites that have no history of IRS.** Malaria incidence, test positivity rate, median age of patients at time of malaria and mutation prevalence are shown for sites that did not receive IRS. The malaria metrics were assessed monthly and are displayed with lowess smoothing. Large arrows indicate times of IRS, as defined in the key. Small arrows indicate times of LLIN distributions. Histogram bars indicate prevalences of Pfk13 mutations (right axis). Lines represent malaria metrics (left axis).

### **SECTION 3: REFERENCES**

1. Asua V, Conrad MD, Aydemir O, et al. Changing Prevalence of Potential Mediators of Aminoquinoline, Antifolate, and Artemisinin Resistance Across Uganda. *J Infect Dis* 2021;223:985-94.
2. Verity R, Aydemir O, Brazeau NF, et al. The impact of antimalarial resistance on the genetic structure of *Plasmodium falciparum* in the DRC. *Nat Commun* 2020;11:2107.
3. Aydemir O, Janko M, Hathaway NJ, et al. Drug Resistance and Population Structure of *Plasmodium falciparum* Across the Democratic Republic of Congo using high-throughput Molecular Inversion Probes. *J Infect Dis* 2018;218:946-55.
4. Asua V, Vinden J, Conrad MD, et al. Changing Molecular Markers of Antimalarial Drug Sensitivity across Uganda. *Antimicrob Agents Chemother* 2019;63:e01818-18.
5. Talundzic E, Okoth SA, Congpuong K, et al. Selection and spread of artemisinin-resistant alleles in Thailand prior to the global artemisinin resistance containment campaign. *PLoS Pathog* 2015;11:e1004789.
6. Clark LV, Schreier AD. Resolving microsatellite genotype ambiguity in populations of allopolyploid and diploidized autopolyploid organisms using negative correlations between allelic variables. *Mol Ecol Resour* 2017;17:1090-103.
7. Paradis E, Schliep K. ape 5.0: an environment for modern phylogenetics and evolutionary analyses in R. *Bioinformatics* 2019;35:526-8.
8. Yu G. Using ggtree to Visualize Data on Tree-Like Structures. *Curr Protoc Bioinformatics* 2020;69:e96.
9. R Core Team. R: A language and environment for statistical computing. Vienna, Austria: R Foundation for Statistical Computing; 2020.
10. RStudio Team. RStudio: Integrated Development for R. Boston, MA: RStudio, Inc.; 2019.
11. Zheng X, Levine D, Shen J, Gogarten SM, Laurie C, Weir BS. A high-performance computing toolset for relatedness and principal component analysis of SNP data. *Bioinformatics* 2012;28:3326-8.
